# Supplementary material for: Organocatalytic Knoevenagel condensation by chiral C2-symmetric tertiary diamines
Source: Royal Society of Chemistry journal article supplement (doi:10.1039/c6nj00613b), 2016-01-01

## Supporting information

### Organocatalytic Knoevenagel Condensation by Chiral C<sub>2</sub>-Symmetric Tertiary Diamines

Xiaoyu Gu<sup>a</sup>, Yan Tang<sup>a</sup>, Xiang Zhang<sup>a</sup>, Zhibin Luo<sup>b</sup> and Hongfei Lu<sup>a\*</sup>

#### Table of Contents

1. Synthesis of the organocatalysts:
  - 1.1 General synthetic procedure for catalyst **1a**
  - 1.2 General synthetic procedure for other catalysts
  - 1.3 Spectral details of organocatalysts
  - 1.4 The crystal structure of compound **1c**
2. General procedure for the catalytic enantioselective Knoevenagel condensation reaction:
  - 2.1 General procedure for racemates preparation
  - 2.2 General procedure, Spectral details for the asymmetric Knoevenagel condensation reaction
  - 2.3 Chromatograms of racemic mixtures and condensates obtained by organocatalysts
3. Copy of original <sup>1</sup>H NMR spectra of all products and <sup>13</sup>C NMR spectra of **4b-f**, **4i** and **4l**

## General Information:

Unless otherwise stated, all reagents were purchased from commercial suppliers and used without further purification. All solvents used in the reactions were distilled from appropriate drying agents prior to use. Reactions were monitored by thin layer chromatography on silica gel. Column chromatography was performed with silica gel 200-300 mesh. All  $^1\text{H}$  NMR and  $^{13}\text{C}$  NMR spectra were recorded in  $\text{CDCl}_3$  and  $\text{CD}_3\text{OD}$  solution and reported in ppm ( $\delta$ ).  $^1\text{H}$  NMR spectra were referenced internally to the residual proton resonance in  $\text{CDCl}_3$  ( $\delta=7.26$  ppm), or with tetramethylsilane (TMS,  $\delta=0.00$  ppm) as the internal standard. HPLC chromatograms of Knoevenagel condensates were obtained using a Shimadzu apparatus, LC-20AT Pump, SPD-10A UV/Vis Detector, SCL-10A System Controller, using a Chiralcel IA (4.6 mm $\times$ 250 mmL, particle size 5 $\mu\text{m}$ ) or a Chiralcel OD-H (4.6 mm $\times$ 250 mmL, particle size 5 $\mu\text{m}$ ).

## 1. Synthesis of the organocatalysts [1]:

### 1.1 General synthetic procedure for catalyst 1a:

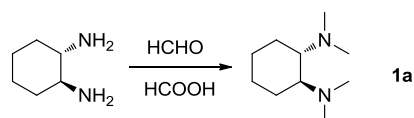

(S, S)-1, 2-Diaminocyclohexane (11.4g, 0.1mol) was dissolved in formic acid 85% (40mL) and paraformaldehyde 95% (50mL) was added slowly at room temperature. The mixture was heated at reflux 6h. After cooling, the reaction mixture was made basic until PH=14 and extracted with ether. The combined organic layers were washed with brine, dried over  $\text{Na}_2\text{SO}_4$ , filtered and concentrated under reduced pressure. The product **1a** was distilled to give a colorless liquid (12.8g 75%).

### 1.2 General synthetic procedure for other catalysts:

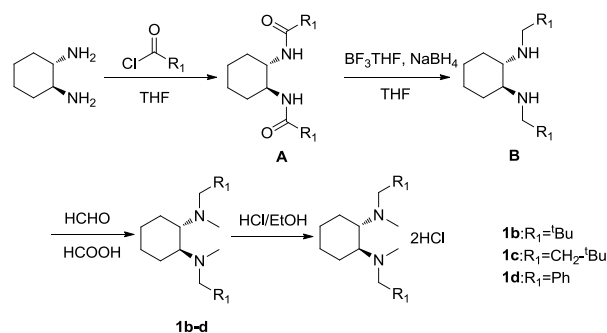

To take 1c as example for synthetic procedure. Drop-wise tert-butylacetyl chloride (14.8g, 0.11mol) was added to a cooled ( $0^\circ\text{C}$ ) solution of 1, 2-Diaminocyclohexane (5.7g, 0.05mol) in dry THF. The suspension was stirred in an ice bath for 30 min, then heated to  $50^\circ\text{C}$ . After stirring 12h at this temperature, the mixture was quenched with 1M aqueous sodium hydroxide until  $\text{pH}>12$ . The layers were separated and the organic phase was washed with brine, driven over  $\text{Na}_2\text{SO}_4$  filtered and concentrated in vacuum. The residue was dried adequately under reduced pressure to give A as a white solid. This material was pure enough to be used in the next step without further purification. To a cooled suspension of A (9.3g, 0.03mol) and  $\text{NaBH}_4$  (4.5 g, 0.12mol) in dry THF (60mL) at  $0^\circ\text{C}$  was added drop-wise a solution of  $\text{BF}_3\cdot\text{THF}$  (37.8g, 0.135mol) in 20mL of dry THF over 30 min. The reaction mixture was heated to reflux slowly and reacted for 72h. The suspension was cooled to room

temperature, poured into crushed ice and extracted with ether. The combined organic layer was dried over  $\text{Na}_2\text{CO}_3$ , filtered and concentrated to give the crude diamine B as a solid, which was methylated without purification. The diamine B (6.8g, 0.24mol) was dissolved in formic acid 85% (35mL), paraformaldehyde 95% (3.0g) was added and the mixture was refluxed 8h. After basification and extraction with ether, the organic layer was dried over  $\text{Na}_2\text{SO}_4$ , filtered and concentrated. The crude product was purified by recrystallization with EtOH-HCl to give the desired products.

### 1.3 Spectral details of organocatalysts<sup>[1]</sup>:

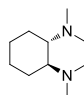

**1a:**  $^1\text{H}$  NMR (500 MHz,  $\text{CDCl}_3$ )  $\delta$  2.37 (dd,  $J = 8.8, 5.7$  Hz, 2H), 2.26 (s, 12H), 1.84–1.79 (m, 2H), 1.74–1.69 (m, 2H), 1.10 (dd,  $J = 16.3, 8.6$  Hz, 4H).  $[\alpha]_{\text{D}}^{20} = -62.9$  (c 1.05,  $\text{CHCl}_3$ ).

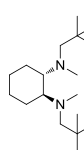

**1b:**  $^1\text{H}$  NMR (500 MHz,  $\text{CDCl}_3$ )  $\delta$  2.35–2.32 (m, 2H), 2.30 (d,  $J = 4.5$  Hz, 4H), 2.28 (s, 6H), 1.75 (d,  $J = 13.1$  Hz, 2H), 1.68–1.61 (m, 2H), 1.22 (ddd,  $J = 21.0, 9.7, 3.3$  Hz, 2H), 1.09–0.99 (m, 2H), 0.88 (s, 18H).  $[\alpha]_{\text{D}}^{20} = +6.3$  (c 1.03,  $\text{CHCl}_3$ ).

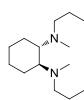

**1c:**  $^1\text{H}$  NMR (500 MHz,  $\text{CDCl}_3$ )  $\delta$  2.46–2.54 (m, 6H), 2.26 (s, 6H), 1.78–1.81 (m, 2H), 1.72–1.73 (m, 2H), 1.40 (m, 4H), 1.11–1.20 (m, 4H), 0.91 (s, 18H).  $[\alpha]_{\text{D}}^{20} = -31.1$  (c 1.02,  $\text{CHCl}_3$ ).

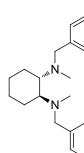

**1d:**  $^1\text{H}$  NMR (500 MHz,  $\text{CDCl}_3$ )  $\delta$  7.38 (d,  $J = 7.3$  Hz, 4H), 7.27 (t,  $J = 7.4$  Hz, 4H), 7.21 (t,  $J = 7.2$  Hz, 2H), 3.74 (d,  $J = 13.3$  Hz, 2H), 3.65 (d,  $J = 13.3$  Hz, 2H), 2.62 (dd,  $J = 5.7, 3.3$  Hz, 2H), 2.21 (s, 6H), 1.92 (d,  $J = 12.8$  Hz, 2H), 1.73 (dd,  $J = 6.4, 2.5$  Hz, 2H), 1.25 (dd,  $J = 8.4, 5.9$  Hz, 2H), 1.12 (t,  $J = 9.5$  Hz, 2H).  $[\alpha]_{\text{D}}^{20} = +7.22$  (c 1.02,  $\text{CHCl}_3$ ).

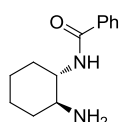

**1e:**  $^1\text{H}$  NMR (400MHz,  $\text{CDCl}_3$ )  $\delta$  7.90-7.74 (m, 2H), 7.59-7.37 (m, 3H), 6.97 (s, 1H), 4.15-4.01 (m, 1H), 3.13 (dd,  $J=8.5, 3.9$ Hz, 1H), 1.71-1.42 (m, 8H).

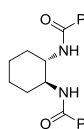

**1f:**  $^1\text{H}$  NMR (300MHz,  $\text{CDCl}_3$ )  $\delta$  7.74-7.67 (m, 4H), 7.48-7.42 (m, 2H), 7.42-7.36 (m, 4H), 3.93 (s, 2H), 2.52-2.49 (m, 2H), 1.91 (d,  $J=12.9$ Hz, 2H), 1.74 (d,  $J=7.9$ Hz, 2H), 1.51 (d,  $J=9.1$ Hz, 2H), 1.29 (t,  $J=9.8$ Hz, 2H).

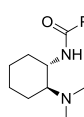

**1g:**  $^1\text{H}$  NMR (400MHz,  $\text{CDCl}_3$ )  $\delta$  7.81 (d,  $J=7.1$ Hz, 2H), 7.46 (dt,  $J=14.5, 7.0$ Hz, 3H), 6.67 (s, 1H), 4.33 (s, 1H), 2.56-2.46 (m, 1H), 2.26 (s, 6H), 2.05 (d,  $J=2.9$ Hz, 2H), 1.81 (dd,  $J=6.0, 2.9$ Hz, 1H), 1.48 (d,  $J=3.1$ Hz, 1H), 1.42-1.22 (m, 4H).

## 1.4 The crystal structure of compound 1c:

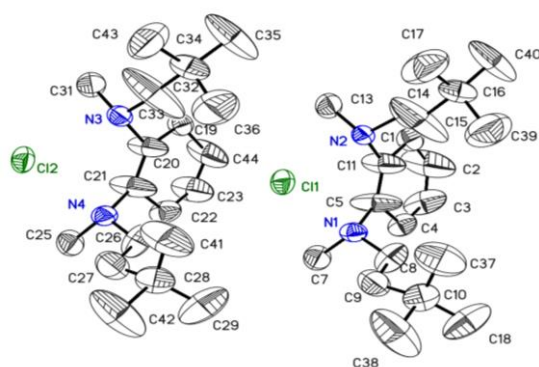

## 2. General procedure for the catalytic enantioselective Knoevenagel condensation reaction:

### 2.1 General procedure for racemates preparation:

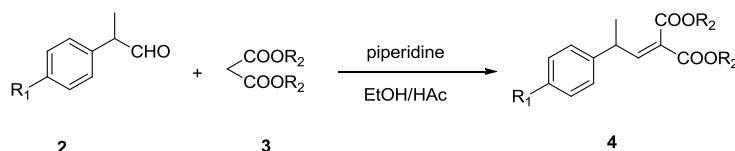

The aldehyde **2** (1 mmol), malonate **3** (1.1 mmol) and piperidine catalyst (0.1mmol) were dissolved in EtOH (3mL) / HAc (0.1mL). After refluxing for 8h, the reaction mixture was poured to water and organic layer was extracted with ethyl acetate. The organic fractions were dried over anhydrous MgSO<sub>4</sub> and concentrated under reduced pressure. Purification by silica gel column chromatography afforded the racemic compound **4**.

### 2.2 General procedure, Spectral details for the asymmetric Knoevenagel condensation reaction:

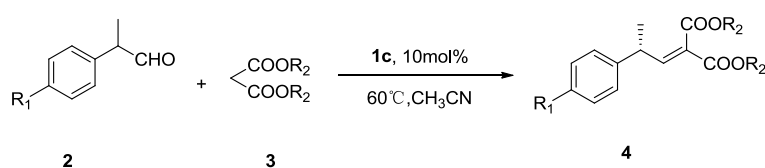

The catalyst **1c** (0.01mmol) and aldehyde **2** (0.1mmol) were dissolved in CH<sub>3</sub>CN (2.0mL). The reaction mixture was stirred for 10min and malonate **3** (1.0mmol) was added at the same temperature. After heating to 60°C and vigorous stirring for 168h, the reaction mixture was poured to water (3mL) and extracted with ethyl acetate (3 × 15mL). The organic fractions were dried over anhydrous MgSO<sub>4</sub> and concentrated under reduced pressure. Purification by flash column chromatography afforded **4a-l** as desired products.

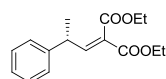

**4a**<sup>[2]</sup>: colorless oil, yield: 75%, <sup>1</sup>H NMR (300MHz, CDCl<sub>3</sub>) δ 7.37 (ddd, *J*=7.1, 4.3, 1.7Hz, 2H), 7.31 (s, 2H), 7.29-7.23 (m, 1H), 7.02 (d, *J*=10.8Hz, 1H), 4.37 (q, *J*=7.1Hz, 2H), 4.25 (q, *J*=7.1Hz, 2H), 3.92 (dq, *J*=10.8, 6.9Hz, 1H), 1.49 (d, *J*=6.9Hz, 3H), 1.38 (t, *J*=7.1Hz, 3H), 1.31 (t, *J*=7.1Hz, 3H). HPLC: Daicel CHIRALCEL IA acetonitrile /methyl alcohol (99/1), flow rate: 0.4mL/min, λ=210nm, (τ<sub>major</sub>=19.567min, τ<sub>minor</sub>=17.089min).

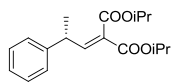

**4b**: colorless oil, yield: 73%,  $^1\text{H NMR}$  (400MHz,  $\text{CDCl}_3$ )  $\delta$  7.35-7.30 (m, 2H), 7.28-7.25 (m, 3H), 6.93 (d,  $J=10.8\text{Hz}$ , 1H), 5.22 (p,  $J=6.3\text{Hz}$ , 1H), 5.07 (p,  $J=6.3\text{Hz}$ , 1H), 3.87 (dq,  $J=10.7$ , 6.9Hz, 1H), 1.45 (d,  $J=6.9\text{Hz}$ , 3H), 1.33 (dd,  $J=6.3$ , 4.4Hz, 6H), 1.29-1.26 (m, 6H).  $^{13}\text{C NMR}$  (126MHz,  $\text{CDCl}_3$ )  $\delta$  150.81, 142.59, 128.72, 127.58, 127.12, 126.86, 68.94, 60.38, 39.46, 21.71, 20.23. HPLC: Daicel CHIRALCEL OD-H hexane/2-propanol (99/1), flow rate: 1mL/min,  $\lambda=220\text{nm}$ , ( $\tau_{\text{major}}=6.085\text{min}$ ,  $\tau_{\text{minor}}=5.368\text{min}$ ).

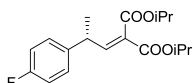

**4c**: colorless oil, yield: 74%,  $^1\text{H NMR}$  (400MHz,  $\text{CDCl}_3$ )  $\delta$  7.25-7.19 (m, 2H), 7.03-6.98 (m, 2H), 6.86 (d,  $J=10.8\text{Hz}$ , 1H), 5.21 (m, 1H), 5.09-5.04 (m, 1H), 3.86 (dq,  $J=10.7$ , 6.9Hz, 1H), 1.43 (d,  $J=7.0\text{Hz}$ , 3H), 1.32 (t,  $J=6.0\text{Hz}$ , 6H), 1.26 (dd,  $J=6.2$ , 2.7Hz, 6H).  $^{13}\text{C NMR}$  (101MHz,  $\text{CDCl}_3$ )  $\delta$  164.02, 162.46, 148.99, 140.59, 130.78, 130.31, 127.88, 127.00, 119.73, 68.07, 37.84, 20.69, 19.11. HPLC: Daicel CHIRALCEL OD-H hexane/2-propanol (99/1), flow rate: 1mL/min,  $\lambda=220\text{nm}$ , ( $\tau_{\text{major}}=4.726\text{min}$ ,  $\tau_{\text{minor}}=4.501\text{min}$ ).

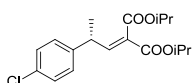

**4d**: colorless oil, yield: 72%,  $^1\text{H NMR}$  (400MHz,  $\text{CDCl}_3$ )  $\delta$  7.28 (dd,  $J=8.4$ , 6.3Hz, 2H), 7.19 (d,  $J=8.5\text{Hz}$ , 2H), 6.85 (d,  $J=10.7\text{Hz}$ , 1H), 5.21 (p,  $J=6.3\text{Hz}$ , 1H), 5.07 (p,  $J=6.3\text{Hz}$ , 1H), 3.86 (dq,  $J=10.7$ , 6.9Hz, 1H), 1.43 (d,  $J=7.0\text{Hz}$ , 3H), 1.32 (d,  $J=6.5\text{Hz}$ , 6H), 1.26 (d,  $J=6.7\text{Hz}$ , 6H).  $^{13}\text{C NMR}$  (101MHz,  $\text{CDCl}_3$ )  $\delta$  165.07, 163.50, 150.13, 141.06, 132.69, 128.84, 128.52, 127.96, 69.10, 38.81, 21.73, 20.18. HPLC: Daicel CHIRALCEL OD-H hexane/2-propanol (99/1), flow rate: 1mL/min,  $\lambda=220\text{nm}$ , ( $\tau_{\text{major}}=5.209\text{min}$ ,  $\tau_{\text{minor}}=4.876\text{min}$ ).

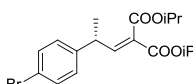

**4e**: colorless oil, yield: 74%,  $^1\text{H NMR}$  (400MHz,  $\text{CDCl}_3$ )  $\delta$  7.46-7.42 (m, 2H), 7.16-7.12 (m, 2H), 6.85 (d,  $J=10.7\text{Hz}$ , 1H), 5.22 (dq,  $J=12.6$ , 6.3Hz, 1H), 5.10-5.04 (m, 1H), 3.84 (dq,  $J=10.8$ , 6.9Hz, 1H), 1.43 (d,  $J=7.0\text{Hz}$ , 3H), 1.33 (d,  $J=6.5\text{Hz}$ , 6H), 1.27-1.25 (m, 6H).  $^{13}\text{C NMR}$  (101MHz,  $\text{CDCl}_3$ )  $\delta$  165.12, 163.54, 150.48, 138.27, 138.24, 128.66, 128.58, 127.72, 115.61, 115.40, 69.04, 38.67, 21.71, 20.29. HPLC: Daicel CHIRALCEL OD-H hexane/2-propanol (99/1), flow rate: 1mL/min,  $\lambda=220\text{nm}$ , ( $\tau_{\text{major}}=5.476\text{min}$ ,  $\tau_{\text{minor}}=5.009\text{min}$ ).

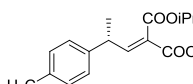

**4f**: colorless oil, yield: 72%,  $^1\text{H NMR}$  (400MHz,  $\text{CDCl}_3$ )  $\delta$  7.19-7.10 (m, 4H), 6.91 (d,  $J=10.8\text{Hz}$ , 1H), 5.22 (p,  $J=6.3\text{Hz}$ , 1H), 5.06 (p,  $J=6.3\text{Hz}$ , 1H), 4.12 (q,  $J=7.1\text{Hz}$ , 1H), 2.32 (s, 3H), 1.43 (d,  $J=6.9\text{Hz}$ , 3H), 1.33 (dd,  $J=6.3$ , 3.0Hz, 6H), 1.26-1.24 (m, 6H).  $^{13}\text{C NMR}$  (101MHz,  $\text{CDCl}_3$ )  $\delta$  165.23, 163.63, 151.07, 139.57, 129.40, 127.36, 127.00, 68.90, 39.10, 29.72, 21.73, 20.99, 20.23. HPLC: Daicel CHIRALCEL OD-H hexane/2-propanol (99/1), flow rate: 1mL/min,  $\lambda=220\text{nm}$ , ( $\tau_{\text{major}}=5.334\text{min}$ ,  $\tau_{\text{minor}}=4.917\text{min}$ ).

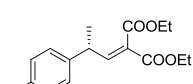

**4g**<sup>[2]</sup>: colorless oil, yield: 72%,  $^1\text{H NMR}$  (400MHz,  $\text{CDCl}_3$ )  $\delta$  7.25-7.20 (m, 2H), 7.01 (t,  $J=8.7\text{Hz}$ , 2H), 6.92 (d,  $J=10.8\text{Hz}$ , 1H), 4.33 (m,  $J=7.1\text{Hz}$ , 2H), 4.23 (m,  $J=7.1\text{Hz}$ , 2H), 3.87 (m,  $J=10.9\text{Hz}$ , 1H), 1.44 (d,  $J=7.0\text{Hz}$ , 3H), 1.35 (t,  $J=7.1\text{Hz}$ , 3H), 1.28 (t,

$J=7.1\text{Hz}$ , 3H). HPLC: Daicel CHIRALCEL OD-H hexane/2-propanol (99/1), flow rate: 1mL/min,  $\lambda=220\text{nm}$ , ( $\tau_{\text{major}}=7.244\text{min}$ ,  $\tau_{\text{minor}}=6.635\text{min}$ ).

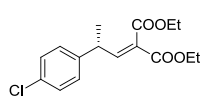

**4h**<sup>[2]</sup>: colorless oil, yield: 72%, <sup>1</sup>H NMR (400MHz, CDCl<sub>3</sub>)  $\delta$  7.31-7.26 (m, 2H), 7.21-7.18 (m, 2H), 6.91 (d,  $J=10.7\text{Hz}$ , 1H), 4.33 (q,  $J=7.1\text{Hz}$ , 2H), 4.23 (q,  $J=7.2\text{ Hz}$ , 2H), 3.87 (dq,  $J=10.7, 6.9\text{Hz}$ , 1H), 1.43 (d,  $J=6.9\text{Hz}$ , 3H), 1.34 (t,  $J=7.1\text{Hz}$ , 3H), 1.29 (d,  $J=7.3\text{Hz}$ , 3H). HPLC: Daicel CHIRALCEL OD-H hexane/2-propanol (99/1), flow rate: 1mL/min,  $\lambda=220\text{nm}$ , ( $\tau_{\text{major}}=6.802\text{min}$ ,  $\tau_{\text{minor}}=6.385\text{min}$ ).

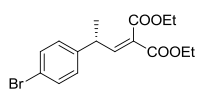

**4i**: colorless oil, yield: 73%, <sup>1</sup>H NMR (400MHz, CDCl<sub>3</sub>)  $\delta$  7.44 (d,  $J=8.5\text{Hz}$ , 2H), 7.14 (d,  $J=8.5\text{Hz}$ , 2H), 6.91 (d,  $J=10.8\text{Hz}$ , 1H), 4.32 (q,  $J=7.1\text{Hz}$ , 2H), 4.23 (dd,  $J=7.2, 2.1\text{Hz}$ , 2H), 3.86 (dd,  $J=10.7, 6.9\text{Hz}$ , 1H), 1.43 (d,  $J=6.9\text{Hz}$ , 3H), 1.36-1.33 (m, 3H), 1.32-1.29 (m, 3H). <sup>13</sup>C NMR (101MHz, CDCl<sub>3</sub>)  $\delta$  168.01, 150.92, 141.33, 131.33, 128.88, 127.66, 119.60, 61.77, 20.10, 16.46. HPLC: Daicel CHIRALCEL OD-H hexane/2-propanol (99/1), flow rate: 1mL/min,  $\lambda=220\text{nm}$ , ( $\tau_{\text{major}}=7.977\text{min}$ ,  $\tau_{\text{minor}}=7.410\text{min}$ ).

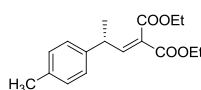

**4j**<sup>[2]</sup>: colorless oil, yield: 70%, <sup>1</sup>H NMR (400MHz, CDCl<sub>3</sub>)  $\delta$  7.20-7.09 (m, 4H), 6.97 (d,  $J=10.8\text{Hz}$ , 1H), 4.33 (q,  $J=7.1\text{Hz}$ , 2H), 4.23 (d,  $J=7.1\text{Hz}$ , 2H), 3.90-3.80 (m, 1H), 2.32 (s, 3H), 1.43 (d,  $J=6.9\text{Hz}$ , 3H), 1.34 (d,  $J=7.1\text{Hz}$ , 3H), 1.27 (d,  $J=1.6\text{Hz}$ , 3H). HPLC: Daicel CHIRALCEL OD-H hexane/2-propanol (99/1), flow rate: 1mL/min,  $\lambda=220\text{nm}$ , ( $\tau_{\text{major}}=7.660\text{min}$ ,  $\tau_{\text{minor}}=6.718\text{min}$ ).

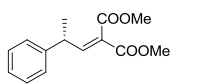

**4k**<sup>[2]</sup>: colorless oil, yield: 71%, <sup>1</sup>H NMR (400MHz, CDCl<sub>3</sub>)  $\delta$  7.36-7.29 (m, 2H), 7.28-7.20 (m, 3H), 7.04 (d,  $J=10.8\text{Hz}$ , 1H), 3.92-3.86 (m, 1H), 3.85 (s, 3H), 3.76 (d,  $J=3.8\text{Hz}$ , 3H), 1.45 (d,  $J=6.9\text{Hz}$ , 3H). HPLC: Daicel CHIRALCEL OD-H hexane/2-propanol (98/2), flow rate: 0.4mL/min,  $\lambda=230\text{nm}$ , ( $\tau_{\text{major}}=13.397\text{min}$ ,  $\tau_{\text{minor}}=11.096\text{min}$ ).

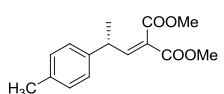

**4l**: colorless oil, yield: 68%, <sup>1</sup>H NMR (400MHz, CDCl<sub>3</sub>)  $\delta$  7.14 (s, 4H), 7.02 (d,  $J=10.9\text{Hz}$ , 1H), 4.12 (d,  $J=7.1\text{Hz}$ , 1H), 3.86 (s, 3H), 3.76 (s, 3H), 2.32 (s, 3H), 1.43 (d,  $J=6.9\text{Hz}$ , 3H). <sup>13</sup>C NMR (101MHz, CDCl<sub>3</sub>)  $\delta$  165.90, 153.10, 139.27, 136.63, 129.46, 126.96, 52.38, 39.27, 21.00, 20.24. HPLC: Daicel CHIRALCEL OD-H hexane/2-propanol (99/1), flow rate: 1mL/min,  $\lambda=220\text{nm}$ , ( $\tau_{\text{major}}=10.320\text{min}$ ,  $\tau_{\text{minor}}=9.270\text{min}$ ).

## 2.3 Chromatograms of racemic mixtures and condensates obtained by organocatalysts:

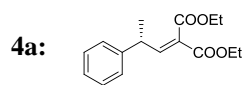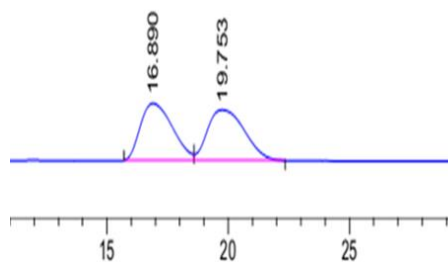

| Peak # | RetTime/ min | Area       | Area%  |
|--------|--------------|------------|--------|
| 1      | 16.890       | 1843.70581 | 49.273 |
| 2      | 19.753       | 1898.12061 | 50.727 |
| Total  |              |            | 100    |

Chromatogram of racemic mixture of **4a**

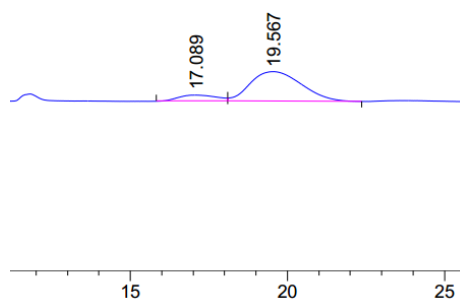

| Peak # | RetTime/ min | Area      | Area%  |
|--------|--------------|-----------|--------|
| 1      | 17.089       | 62.37217  | 13.477 |
| 2      | 19.567       | 400.42651 | 86.523 |
| Total  |              |           | 100    |

Chromatogram of **4a**

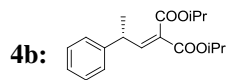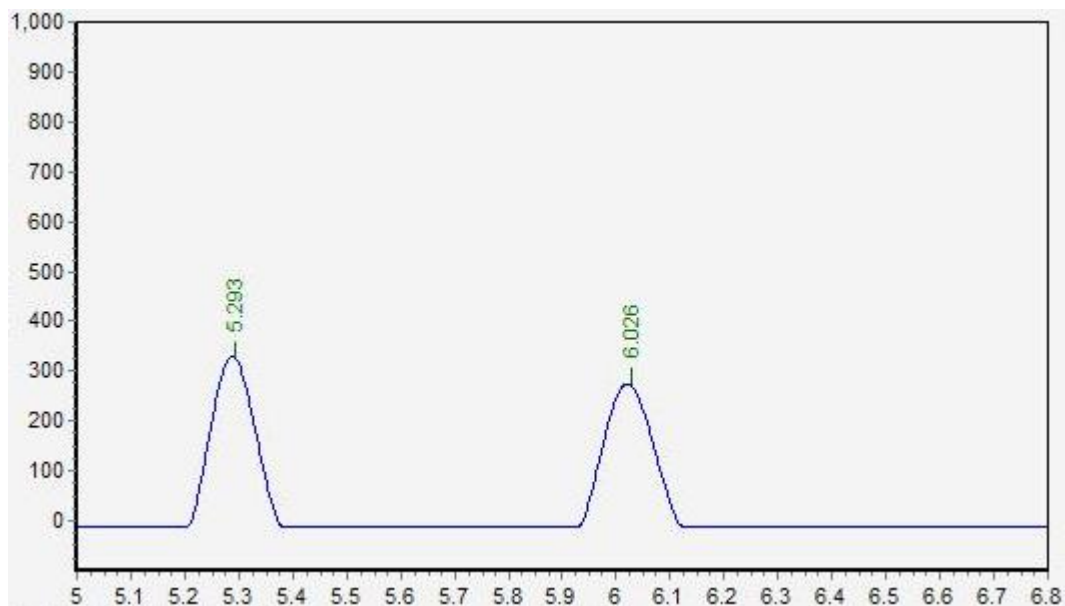

| Peak # | RetTime/ min | Height     | Area        | Area%  |
|--------|--------------|------------|-------------|--------|
| 1      | 5.293        | 339525.844 | 1867389.875 | 51.562 |
| 2      | 6.026        | 284525.156 | 1754240.000 | 48.438 |
| Total  |              |            |             | 100    |

Chromatogram of racemic mixture of **4b**

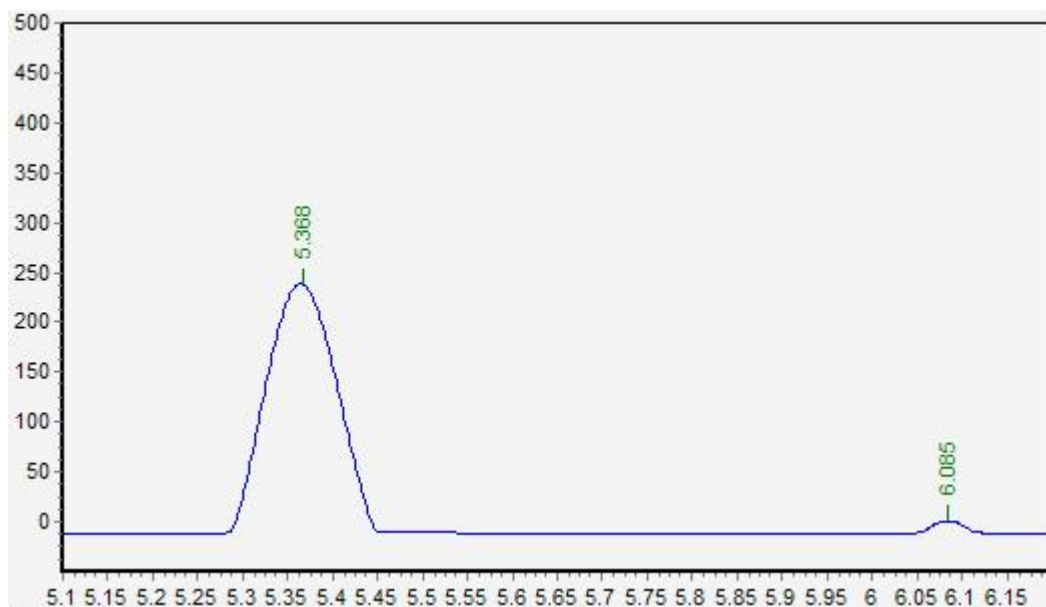

| Peak # | RetTime/ min | Height     | Area        | Area%  |
|--------|--------------|------------|-------------|--------|
| 1      | 5.368        | 248775.563 | 1338241.750 | 98.060 |
| 2      | 6.085        | 11587.044  | 26466.051   | 1.940  |
| Total  |              |            |             | 100    |

Chromatogram of **4b**



4c:

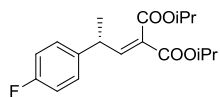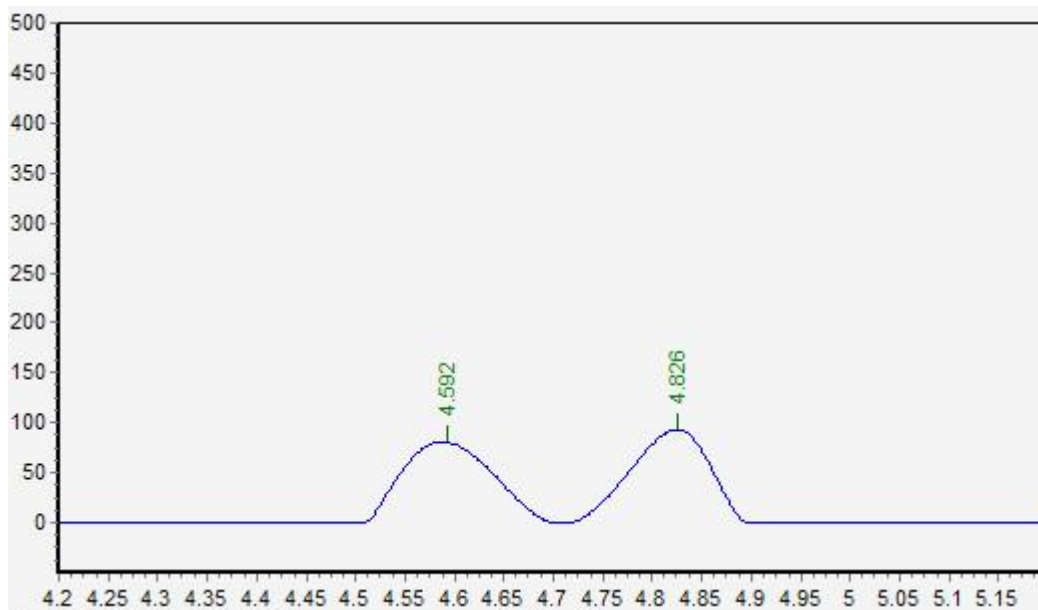

| Peak # | RetTime/ min | Height    | Area       | Area%  |
|--------|--------------|-----------|------------|--------|
| 1      | 4.592        | 80818.070 | 514359.063 | 49.921 |
| 2      | 4.826        | 93171.453 | 515983.344 | 50.079 |
| Total  |              |           |            | 100    |

Chromatogram of racemic mixture of **4c**

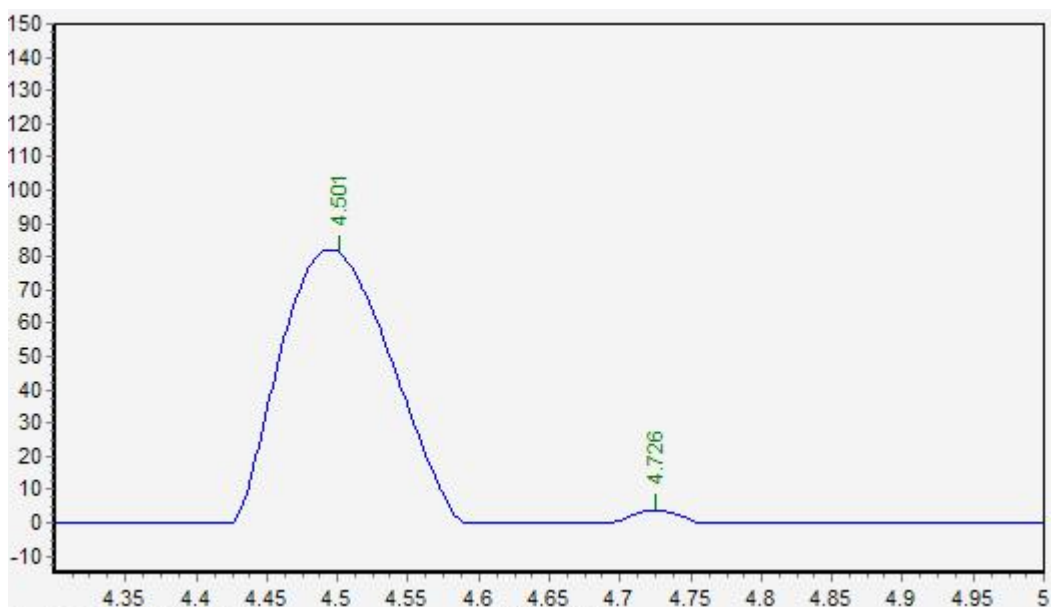

| Peak # | RetTime/ min | Height    | Area       | Area%  |
|--------|--------------|-----------|------------|--------|
| 1      | 4.501        | 81888.250 | 441521.125 | 98.120 |
| 2      | 4.726        | 3687.813  | 8468.079   | 1.880  |
| Total  |              |           |            | 100    |

Chromatogram of **4c**

**4d:**

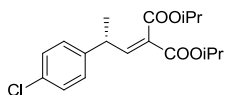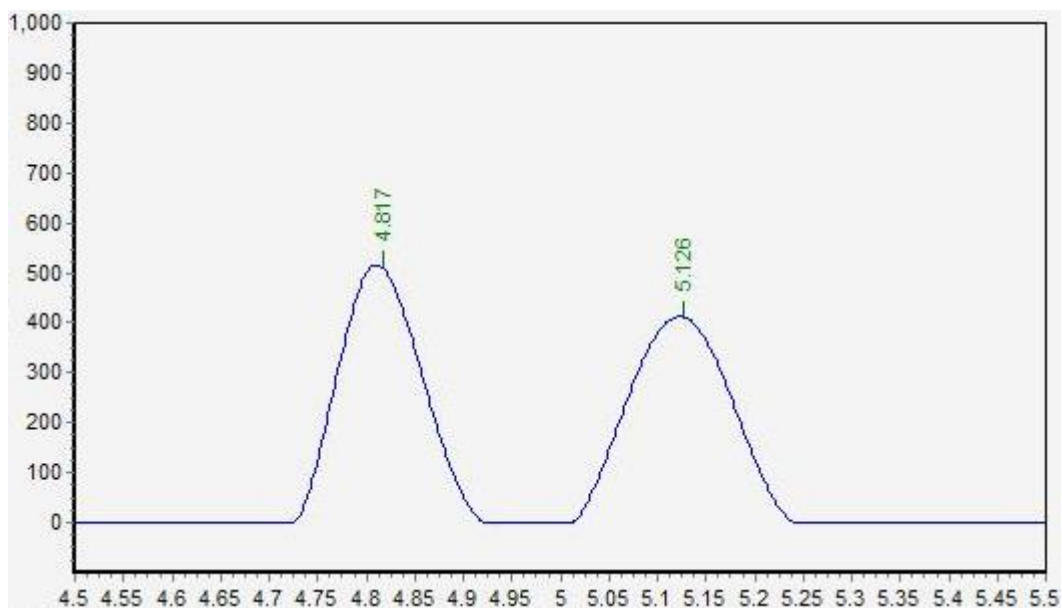

| Peak # | RetTime/ min | Height     | Area        | Area%  |
|--------|--------------|------------|-------------|--------|
| 1      | 4.817        | 513490.938 | 3051591.250 | 50.164 |
| 2      | 5.126        | 412100.156 | 3031594.250 | 49.836 |
| Total  |              |            |             | 100    |

Chromatogram of racemic mixture of **4d**

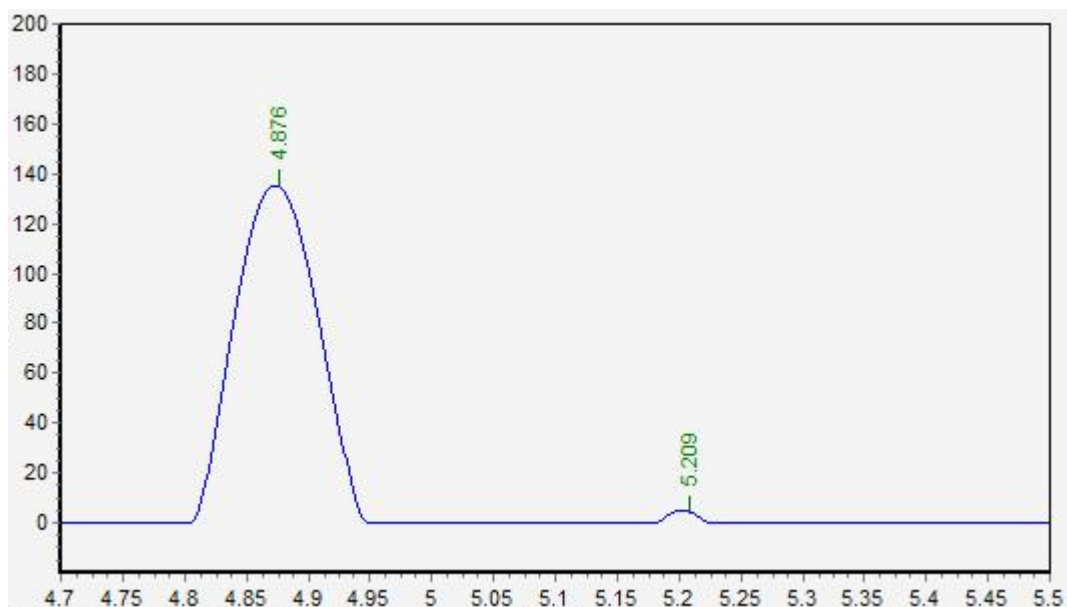

| Peak # | RetTime/ min | Height     | Area       | Area%  |
|--------|--------------|------------|------------|--------|
| 1      | 4.876        | 134740.000 | 628086.375 | 98.783 |
| 2      | 5.209        | 4804.000   | 7732.900   | 1.217  |
| Total  |              |            |            | 100    |

Chromatogram of **4d**

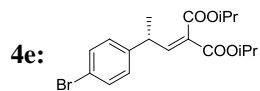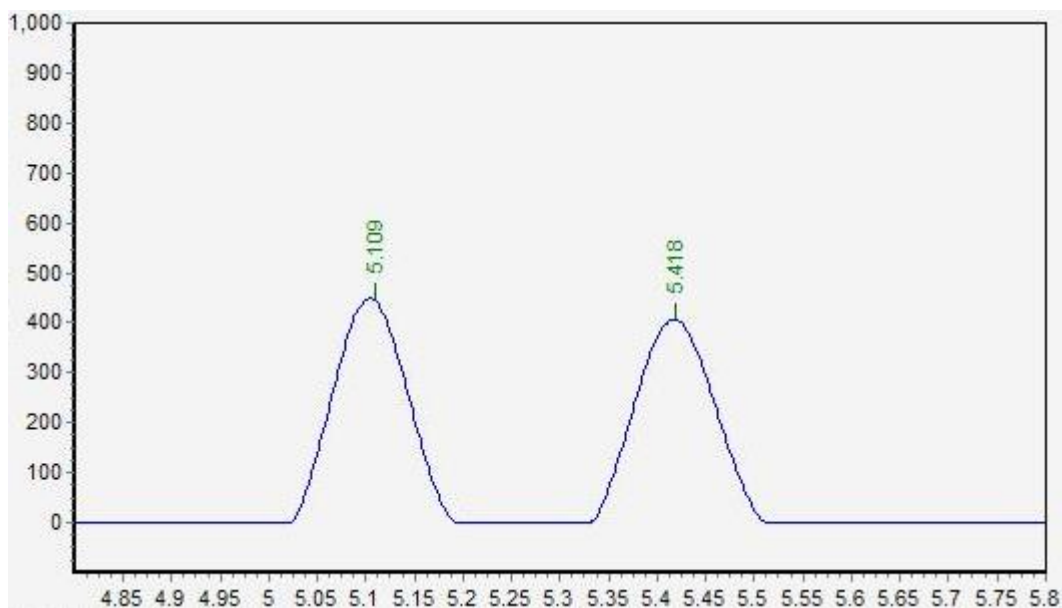

| Peak # | RetTime/ min | Height     | Area        | Area%  |
|--------|--------------|------------|-------------|--------|
| 1      | 5.109        | 447233.813 | 2350263.000 | 50.664 |
| 2      | 5.418        | 405149.156 | 2288643.000 | 49.336 |
| Total  |              |            |             | 100    |

Chromatogram of racemic mixture of **4e**

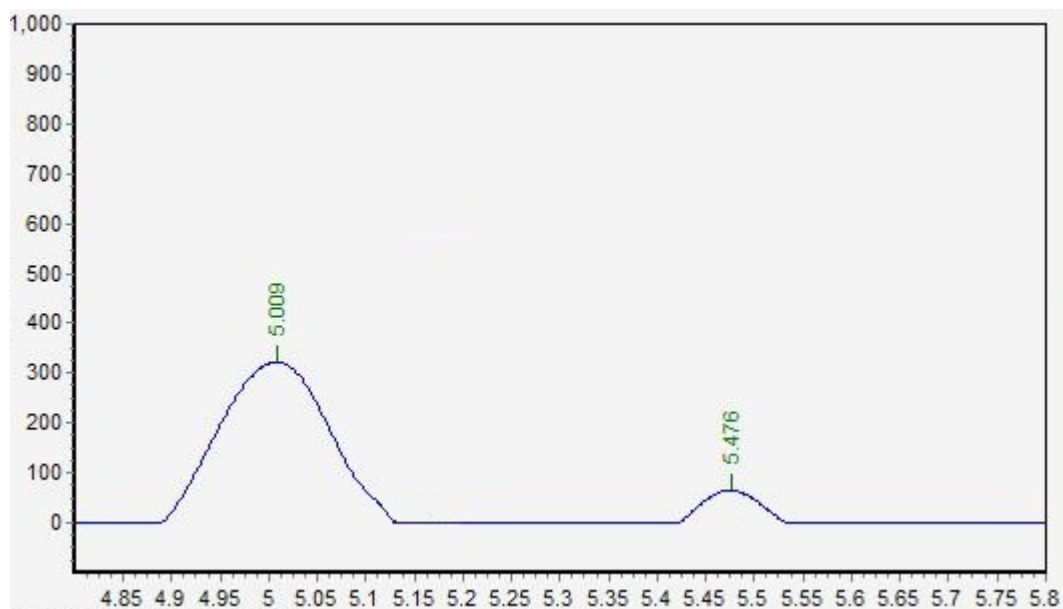

| Peak # | RetTime/ min | Height     | Area        | Area%  |
|--------|--------------|------------|-------------|--------|
| 1      | 5.009        | 322118.844 | 2623093.250 | 91.012 |
| 2      | 5.476        | 64789.281  | 259028.500  | 8.988  |
| Total  |              |            |             | 100    |

Chromatogram of **4e**

4f:

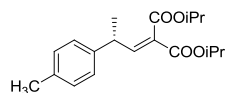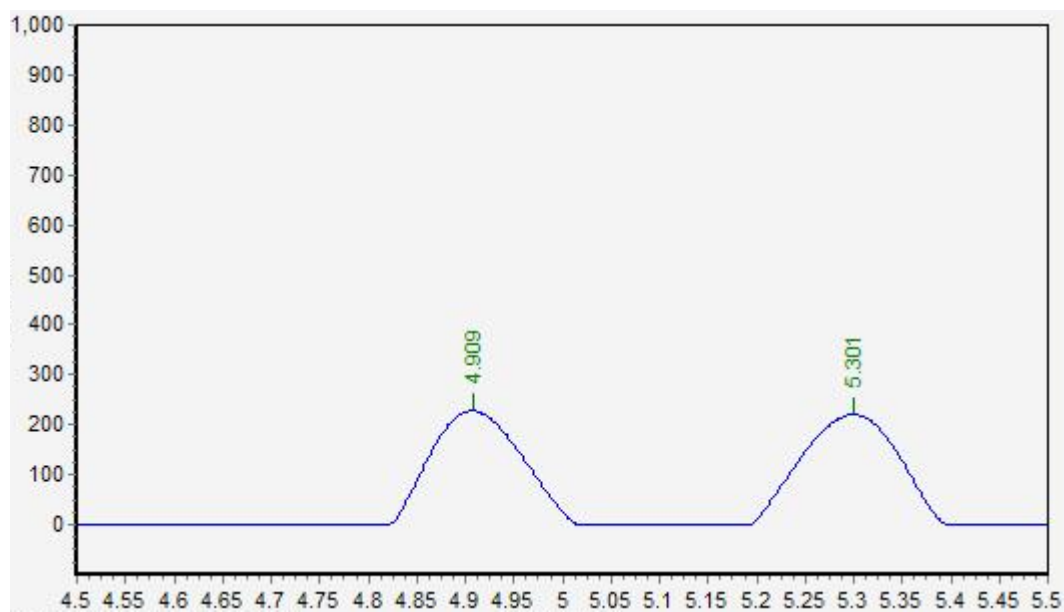

| Peak # | RetTime/ min | Height     | Area        | Area%  |
|--------|--------------|------------|-------------|--------|
| 1      | 4.909        | 227756.781 | 1482091.875 | 49.200 |
| 2      | 5.301        | 220025.875 | 1530298.375 | 50.800 |
| Total  |              |            |             | 100    |

Chromatogram of racemic mixture of **4f**

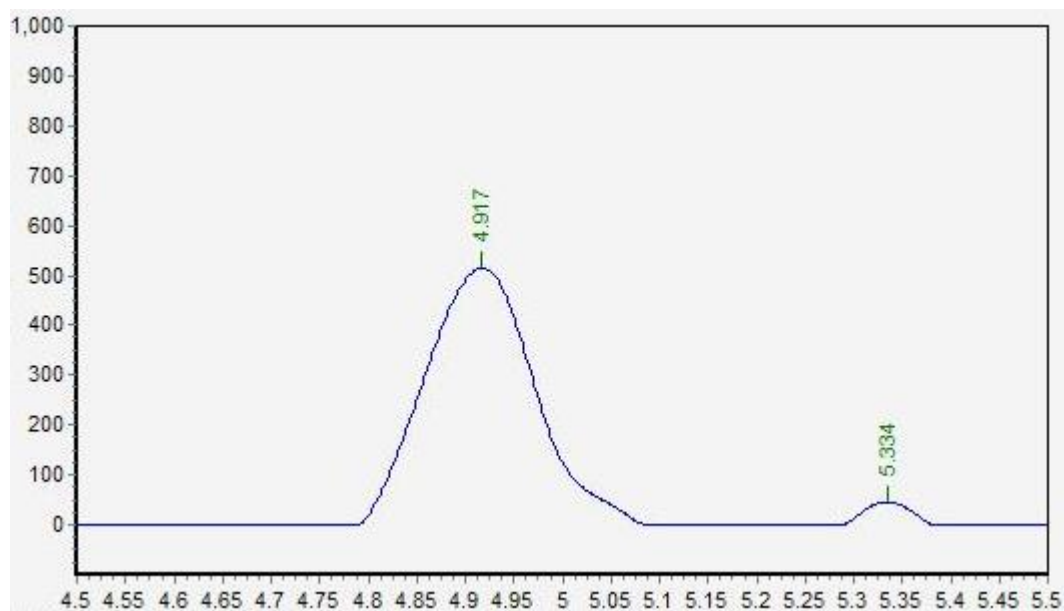

| Peak # | RetTime/ min | Height     | Area        | Area%  |
|--------|--------------|------------|-------------|--------|
| 1      | 4.917        | 513338.500 | 4037205.750 | 96.418 |
| 2      | 5.334        | 45135.137  | 149984.797  | 3.582  |
| Total  |              |            |             | 100    |

Chromatogram of **4f**

4g:

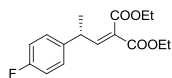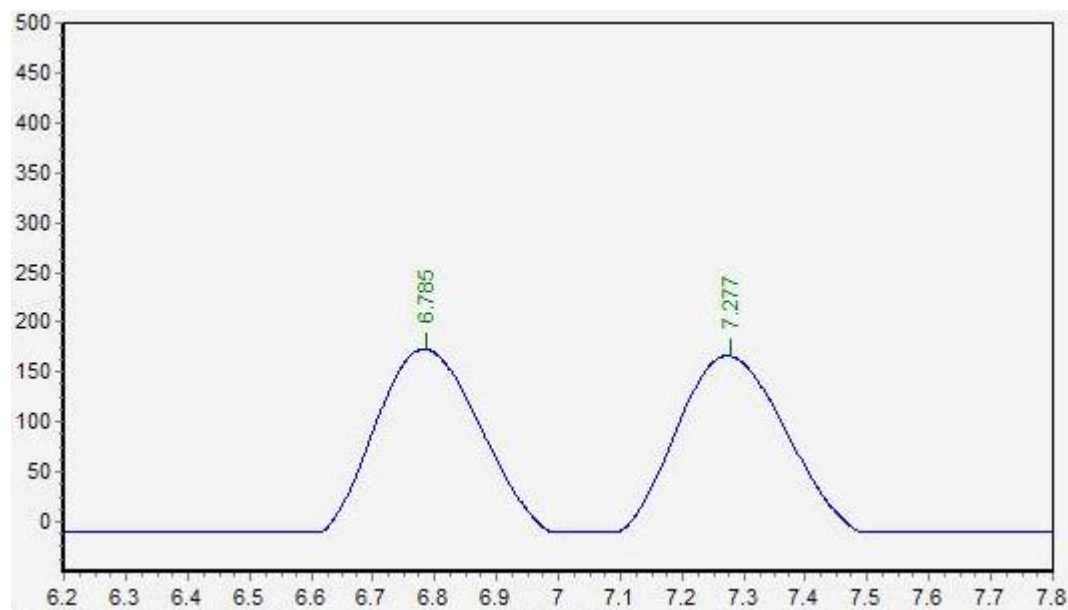

| Peak # | RetTime/ min | Height     | Area        | Area%  |
|--------|--------------|------------|-------------|--------|
| 1      | 6.785        | 183160.313 | 2107645.250 | 49.896 |
| 2      | 7.277        | 176311.175 | 2116408.000 | 50.104 |
| Total  |              |            |             | 100    |

Chromatogram of racemic mixture of **4g**

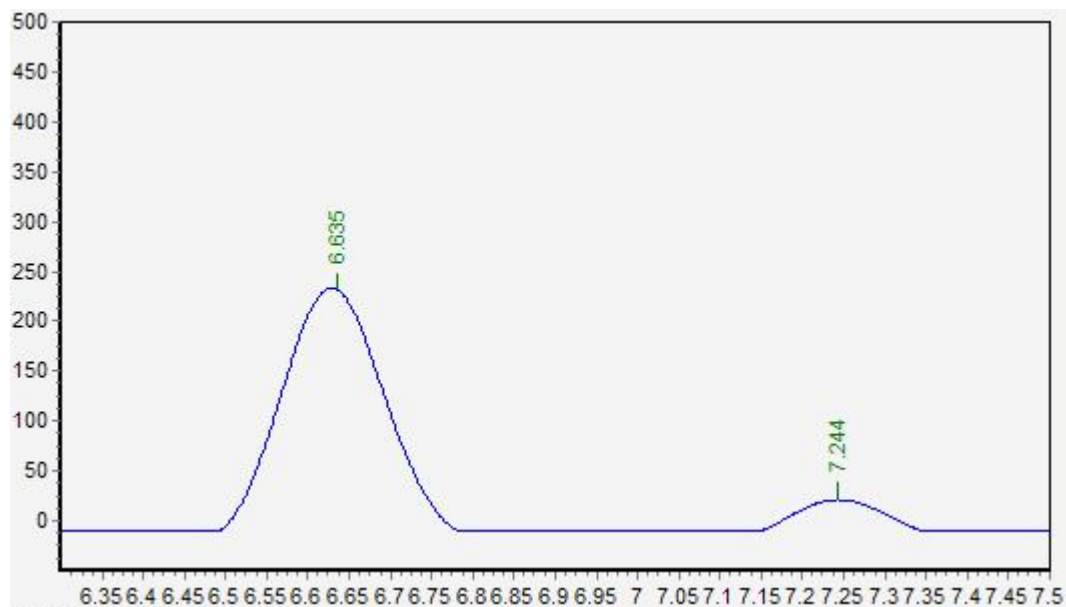

| Peak # | RetTime/ min | Height     | Area        | Area%  |
|--------|--------------|------------|-------------|--------|
| 1      | 6.635        | 242946.813 | 2051427.500 | 90.535 |
| 2      | 7.244        | 31242.648  | 214449.953  | 9.465  |
| Total  |              |            |             | 100    |

Chromatogram of **4g**

4h:

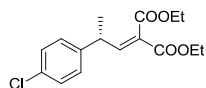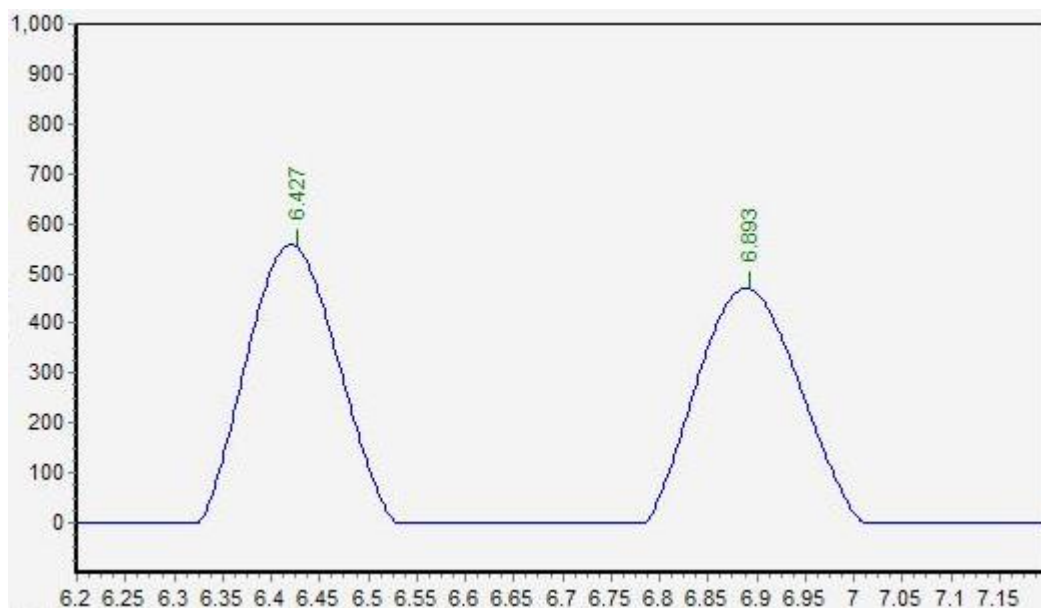

| Peak # | RetTime/ min | Height     | Area        | Area%  |
|--------|--------------|------------|-------------|--------|
| 1      | 6.427        | 556001.250 | 3577783.500 | 51.237 |
| 2      | 6.893        | 469305.219 | 3405034.250 | 48.763 |
| Total  |              |            |             | 100    |

Chromatogram of racemic mixture of **4h**

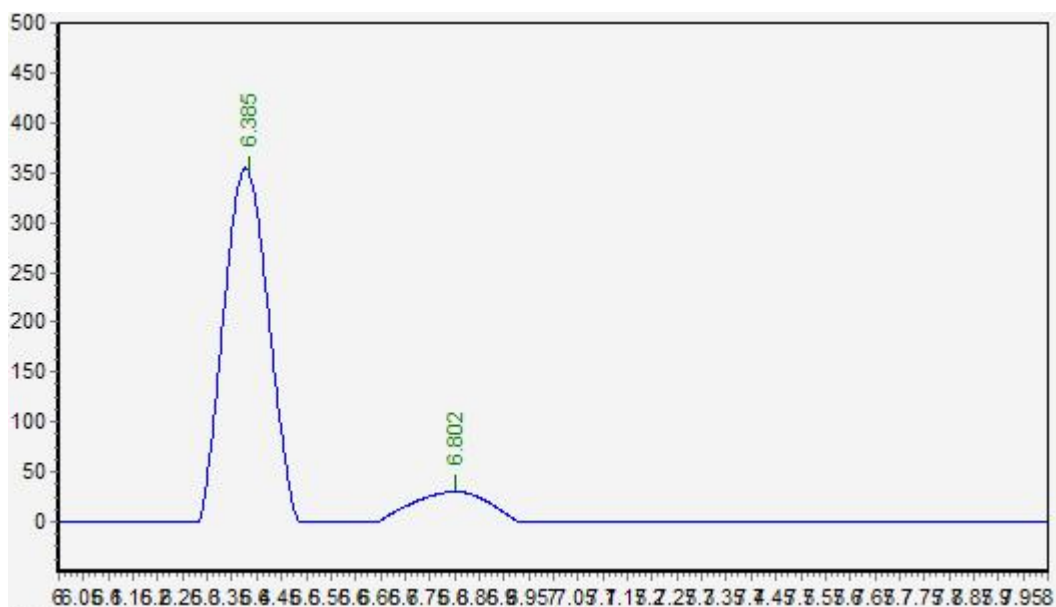

| Peak # | RetTime/ min | Height     | Area        | Area%  |
|--------|--------------|------------|-------------|--------|
| 1      | 6.385        | 352630.125 | 2208220.000 | 87.323 |
| 2      | 6.802        | 30105.619  | 320612.500  | 12.677 |
| Total  |              |            |             | 100    |

Chromatogram of **4h**

4i:

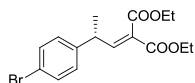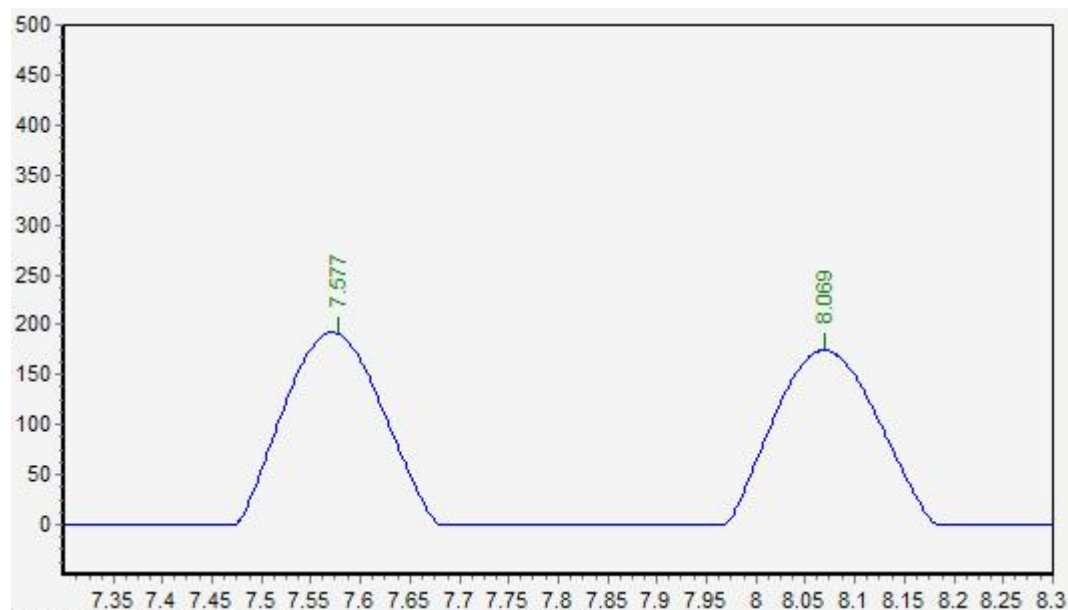

| Peak # | RetTime/ min | Height     | Area        | Area%  |
|--------|--------------|------------|-------------|--------|
| 1      | 7.577        | 192087.594 | 1322351.625 | 51.196 |
| 2      | 8.069        | 172415.672 | 1260554.000 | 48.804 |
| Total  |              |            |             | 100    |

Chromatogram of racemic mixture of **4i**

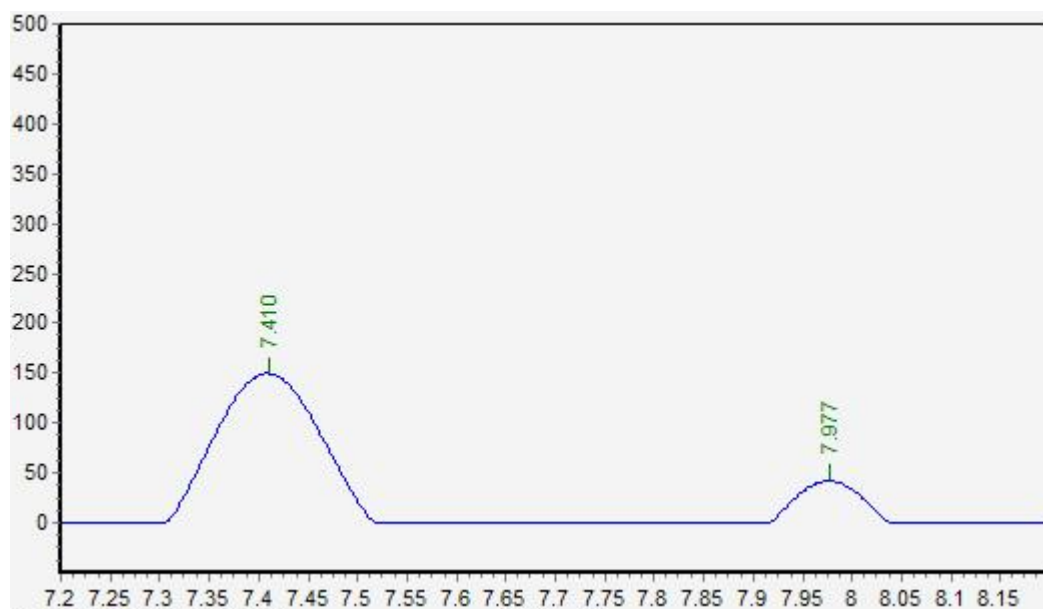

| Peak # | RetTime/ min | Height     | Area        | Area%  |
|--------|--------------|------------|-------------|--------|
| 1      | 7.410        | 149584.938 | 1072228.000 | 85.174 |
| 2      | 7.977        | 41746.000  | 186640.797  | 14.826 |
| Total  |              |            |             | 100    |

Chromatogram of **4i**

4j:

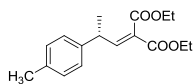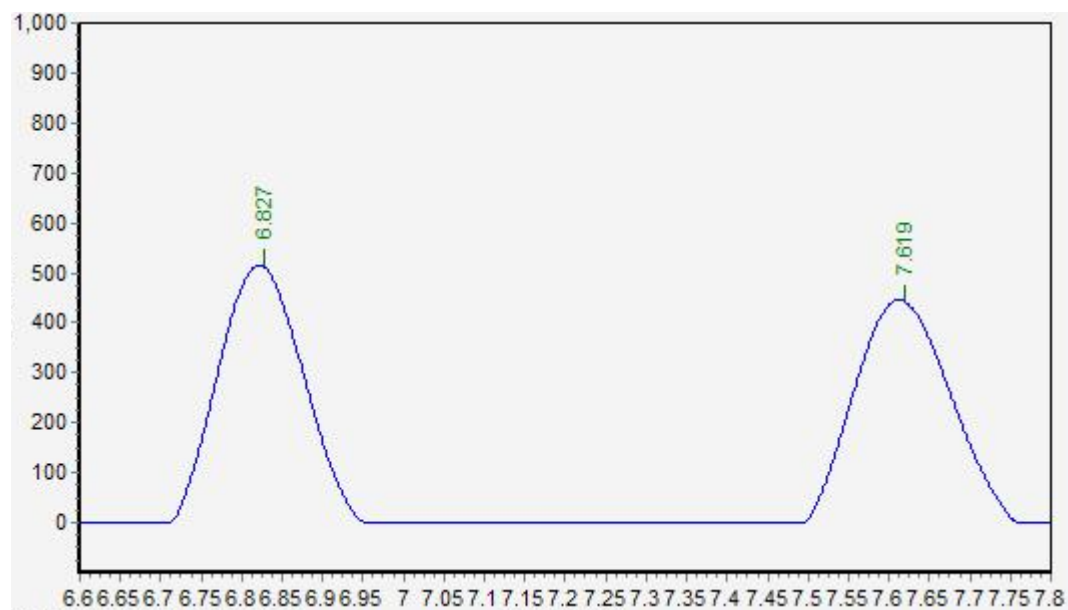

| Peak # | RetTime/ min | Height     | Area        | Area%  |
|--------|--------------|------------|-------------|--------|
| 1      | 6.827        | 514620.844 | 3727768.000 | 50.573 |
| 2      | 7.619        | 444577.500 | 3643328.500 | 49.427 |
| Total  |              |            |             | 100    |

Chromatogram of racemic mixture of **4j**

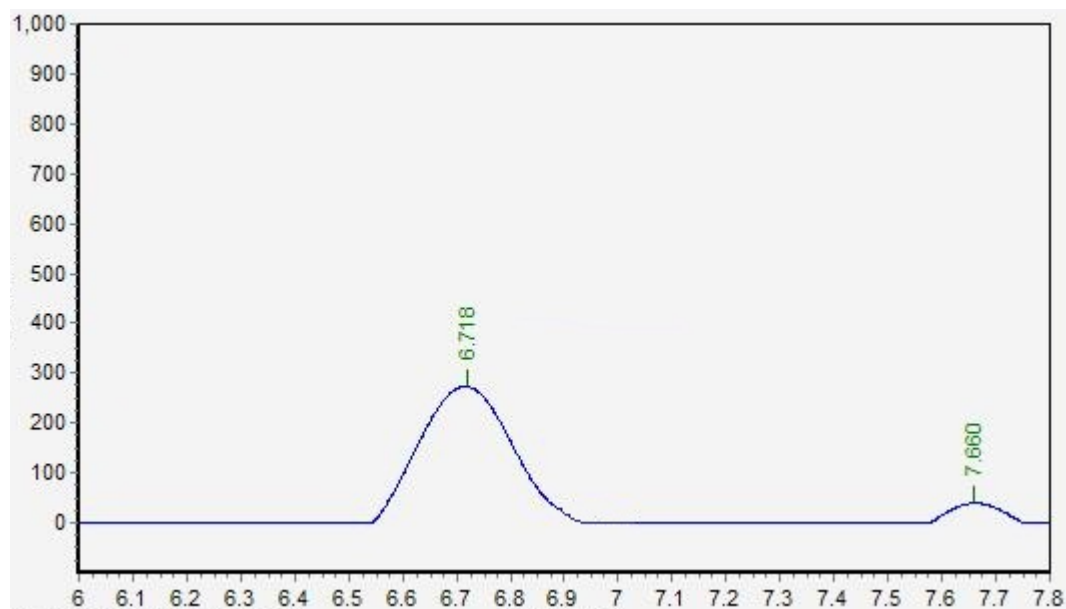

| Peak # | RetTime/ min | Height     | Area        | Area%  |
|--------|--------------|------------|-------------|--------|
| 1      | 6.718        | 273170.281 | 3334752.750 | 92.920 |
| 2      | 7.660        | 39300.637  | 254106.156  | 7.080  |
| Total  |              |            |             | 100    |

Chromatogram of **4j**



4k:

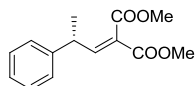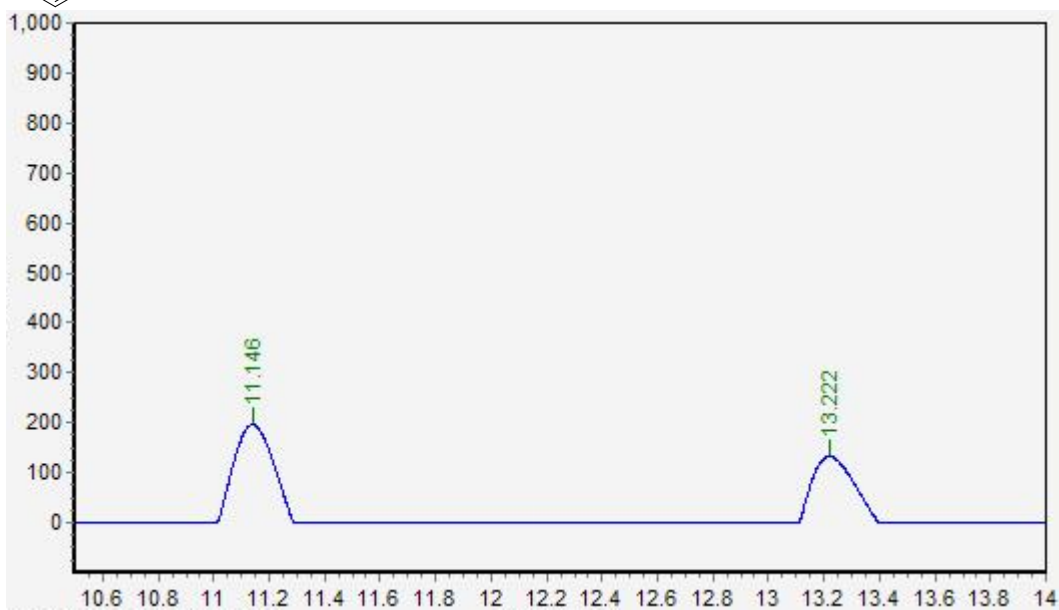

| Peak # | RetTime/ min | Height     | Area        | Area%  |
|--------|--------------|------------|-------------|--------|
| 1      | 11.146       | 186389.328 | 1717009.500 | 50.797 |
| 2      | 13.222       | 142371.953 | 1663098.875 | 49.203 |
| Total  |              |            |             | 100    |

Chromatogram of racemic mixture of **4k**

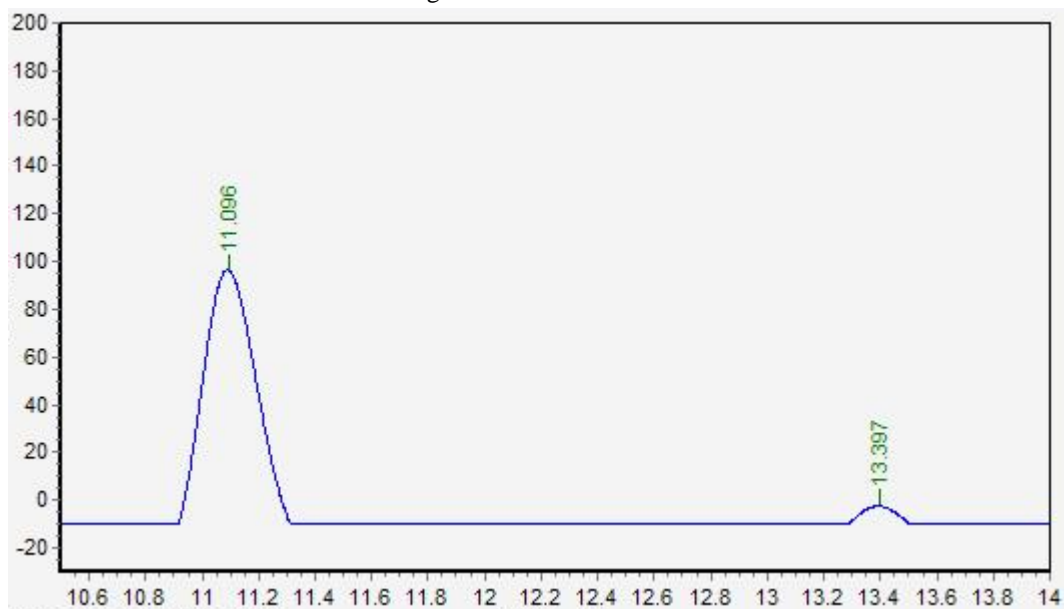

| Peak # | RetTime/ min | Height     | Area        | Area%  |
|--------|--------------|------------|-------------|--------|
| 1      | 11.096       | 106453.305 | 1337974.250 | 95.580 |
| 2      | 13.397       | 7577.231   | 61883.199   | 4.420  |
| Total  |              |            |             | 100    |

Chromatogram of **4k**

4l:

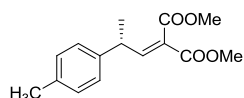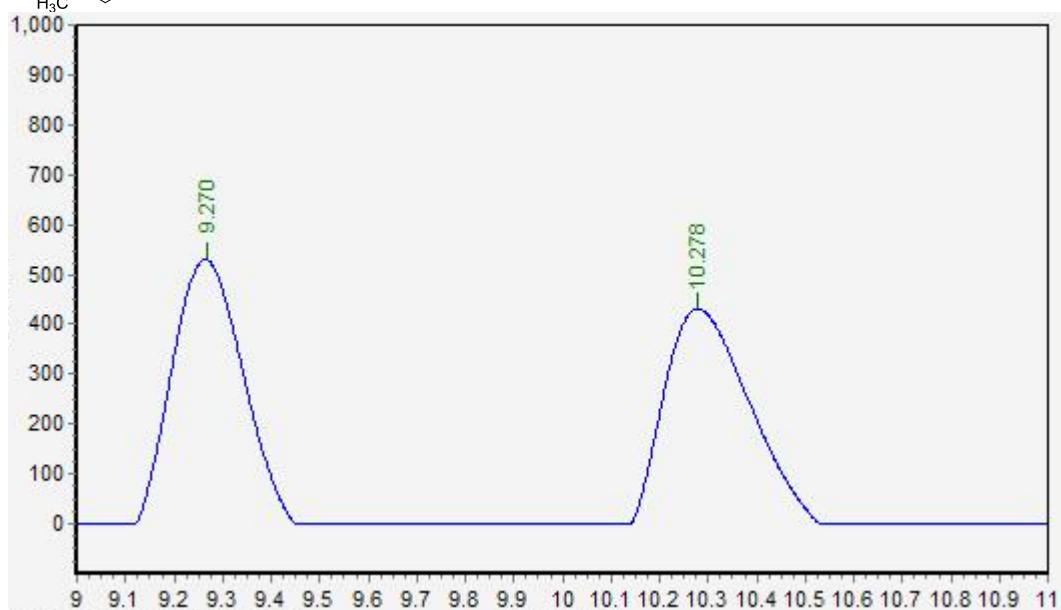

| Peak # | RetTime/ min | Height     | Area        | Area%  |
|--------|--------------|------------|-------------|--------|
| 1      | 9.270        | 529697.250 | 5315405.000 | 50.587 |
| 2      | 10.278       | 430680.594 | 5192008.500 | 49.413 |
| Total  |              |            |             | 100    |

Chromatogram of racemic mixture of 4l

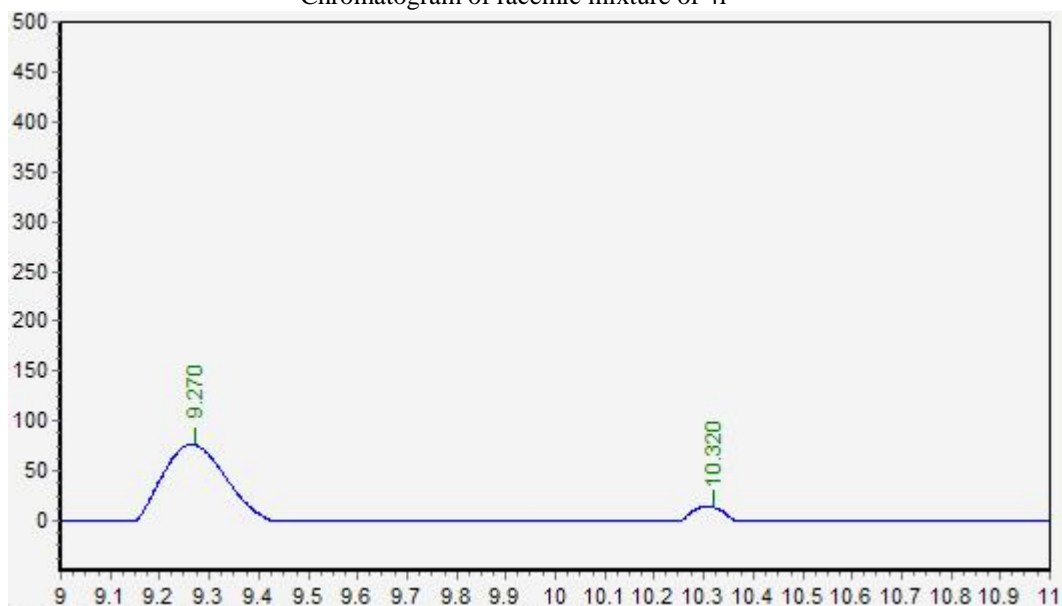

| Peak # | RetTime/ min | Height    | Area       | Area%  |
|--------|--------------|-----------|------------|--------|
| 1      | 9.270        | 76335.484 | 664035.188 | 91.500 |
| 2      | 10.320       | 14310.923 | 61698.898  | 8.500  |
| Total  |              |           |            | 100    |

Chromatogram of 4l

**Reference:**

[1] J. Kizirian, N. Cabello, L. Pinchard, J. Caille, A. Alexakis, *Tetrahedron*. **2005**, *61*, 8939-8946.

[2] A. Lee, A. Michrowska, S. Sulzer-Mosse, B. List, *Angew. Chem., Int. Ed.* **2011**, *50*, 1707.

3. Copy of original  $^1\text{H}$  NMR spectra of all products and  $^{13}\text{C}$  NMR spectra of 4b-f, 4i and 4l

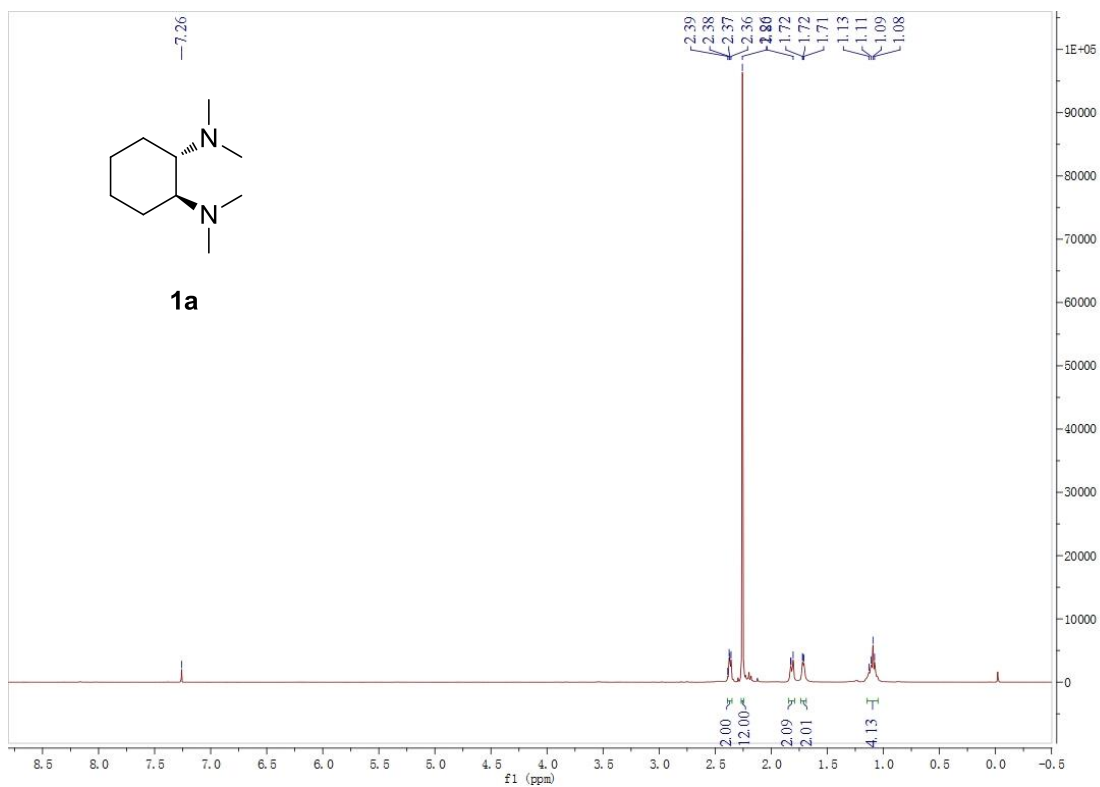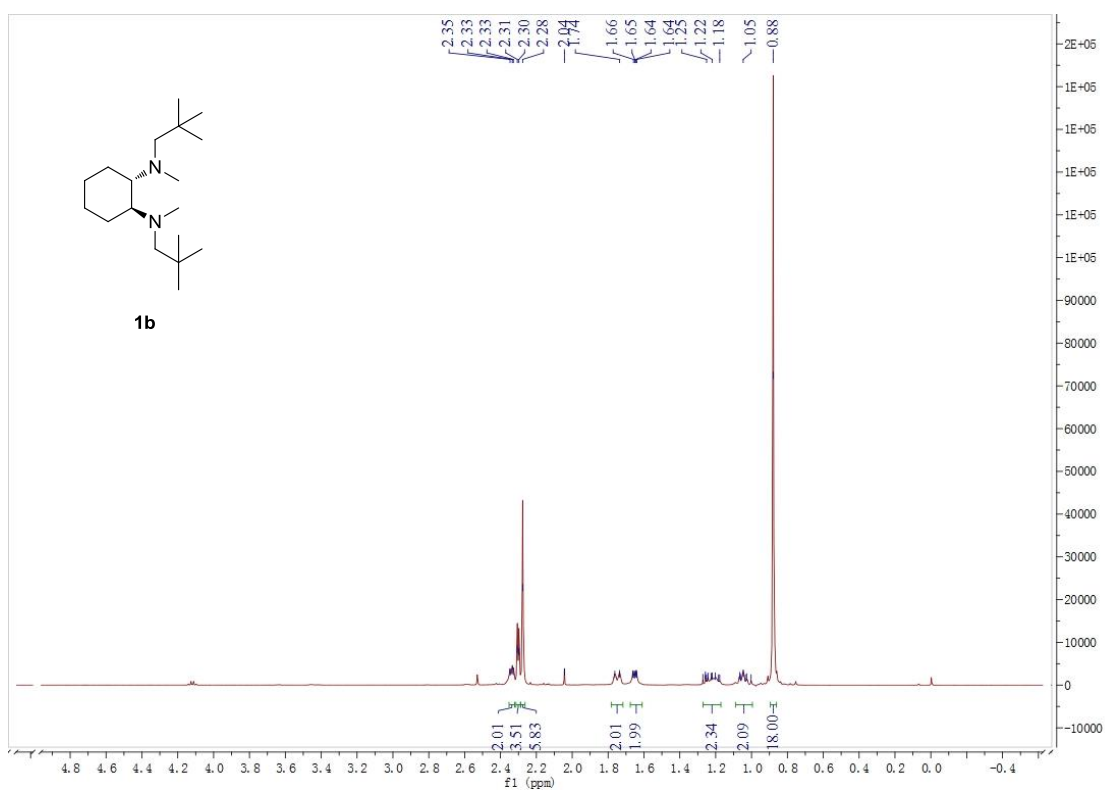

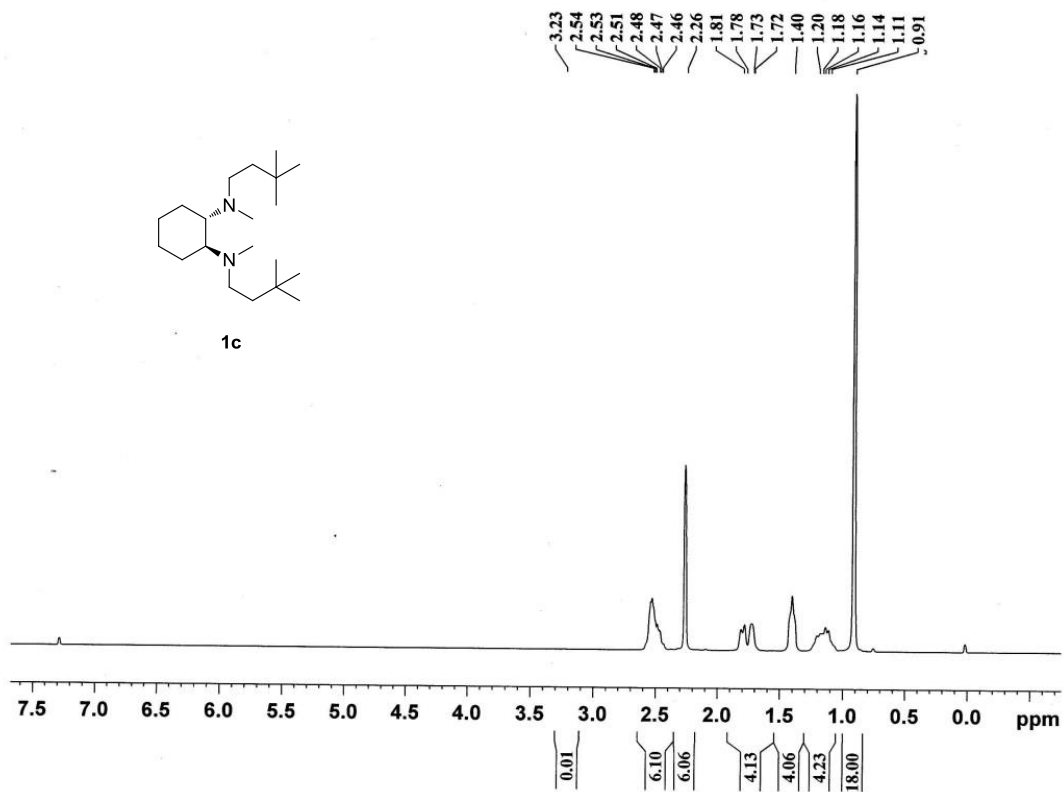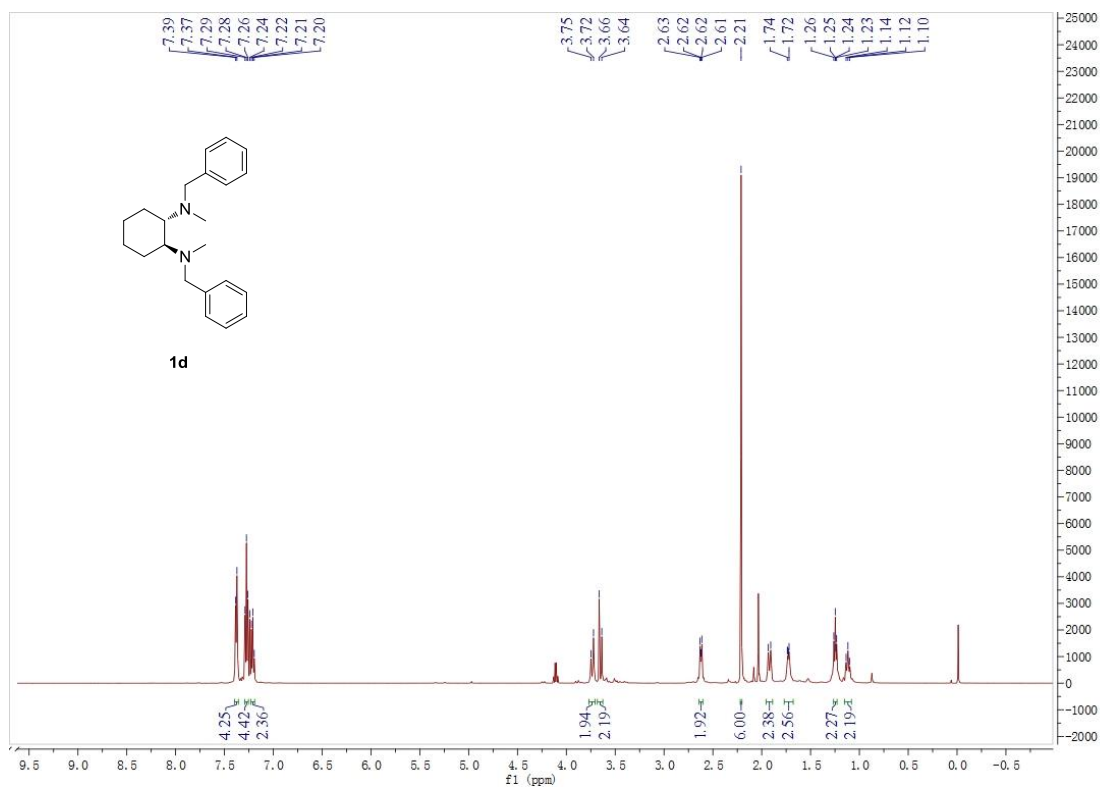

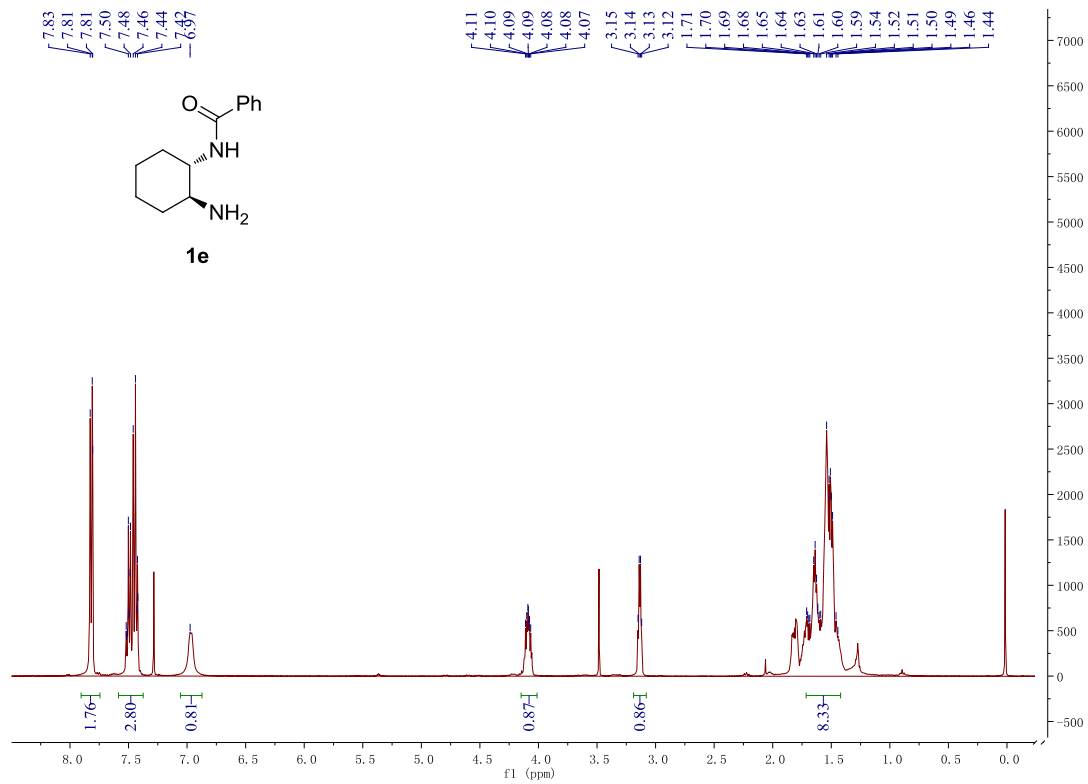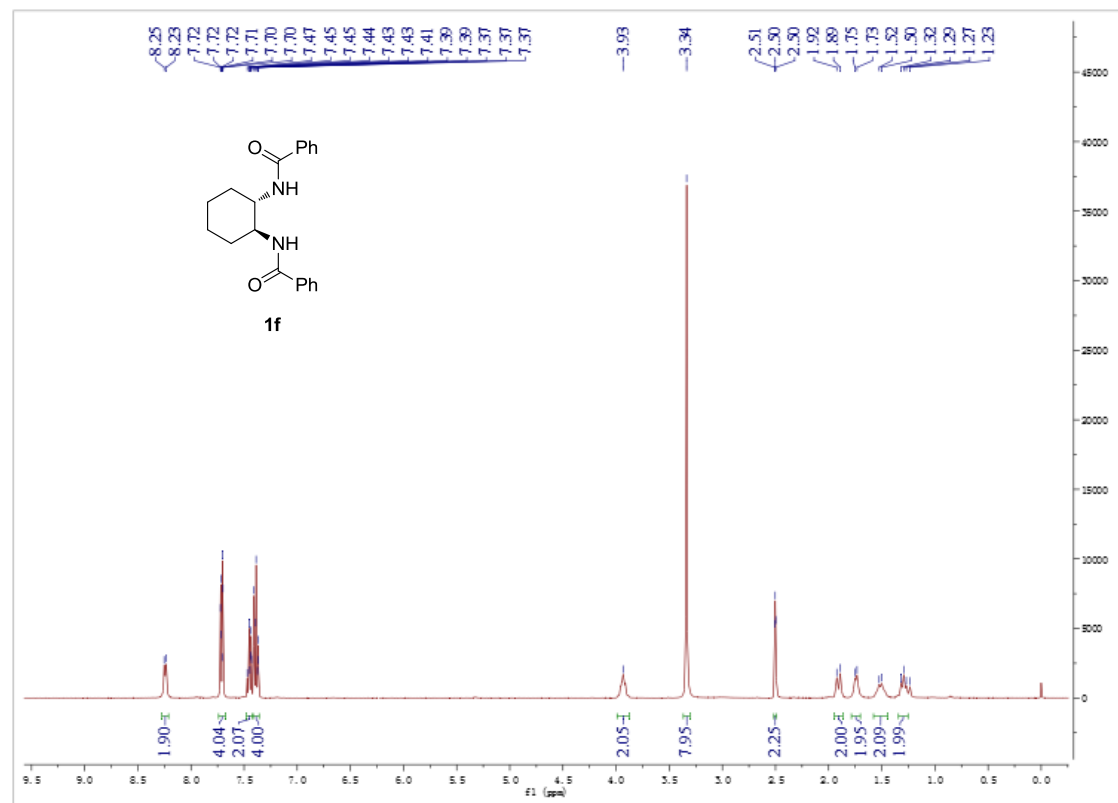



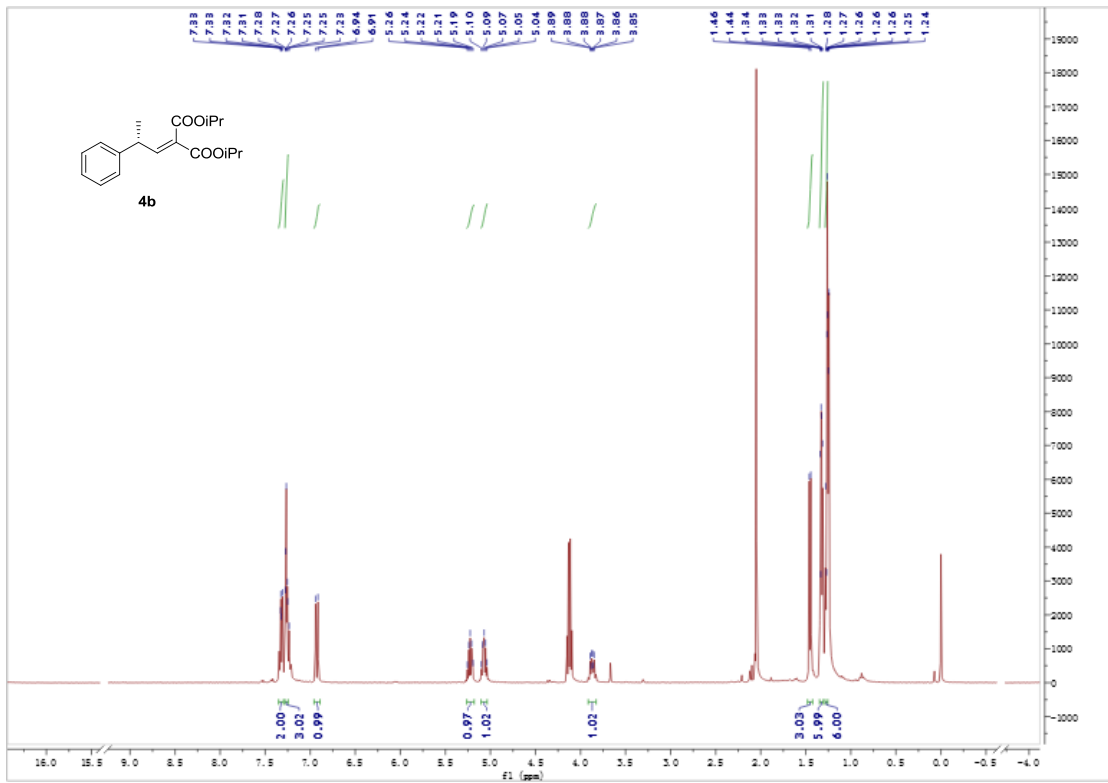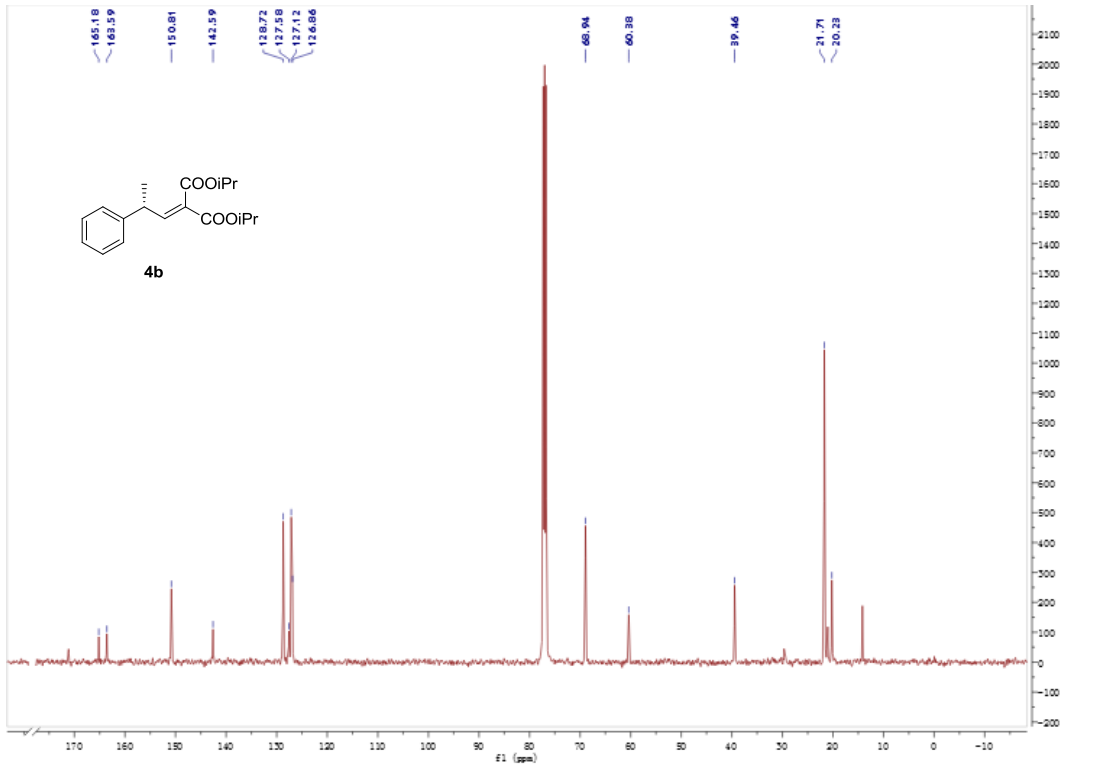



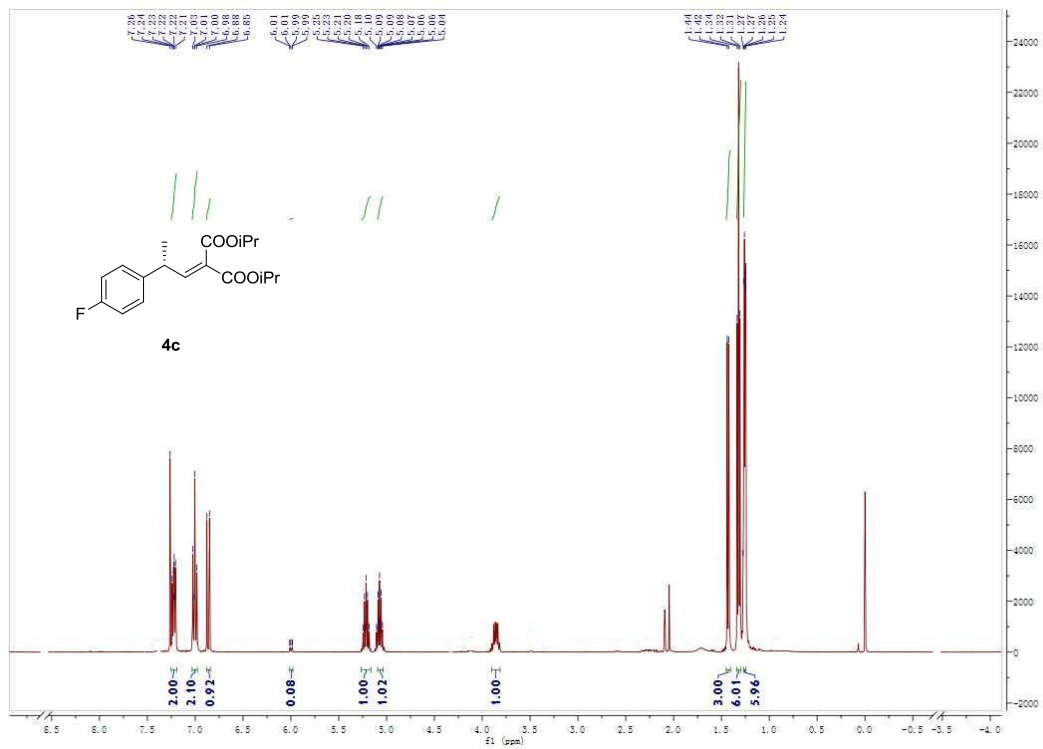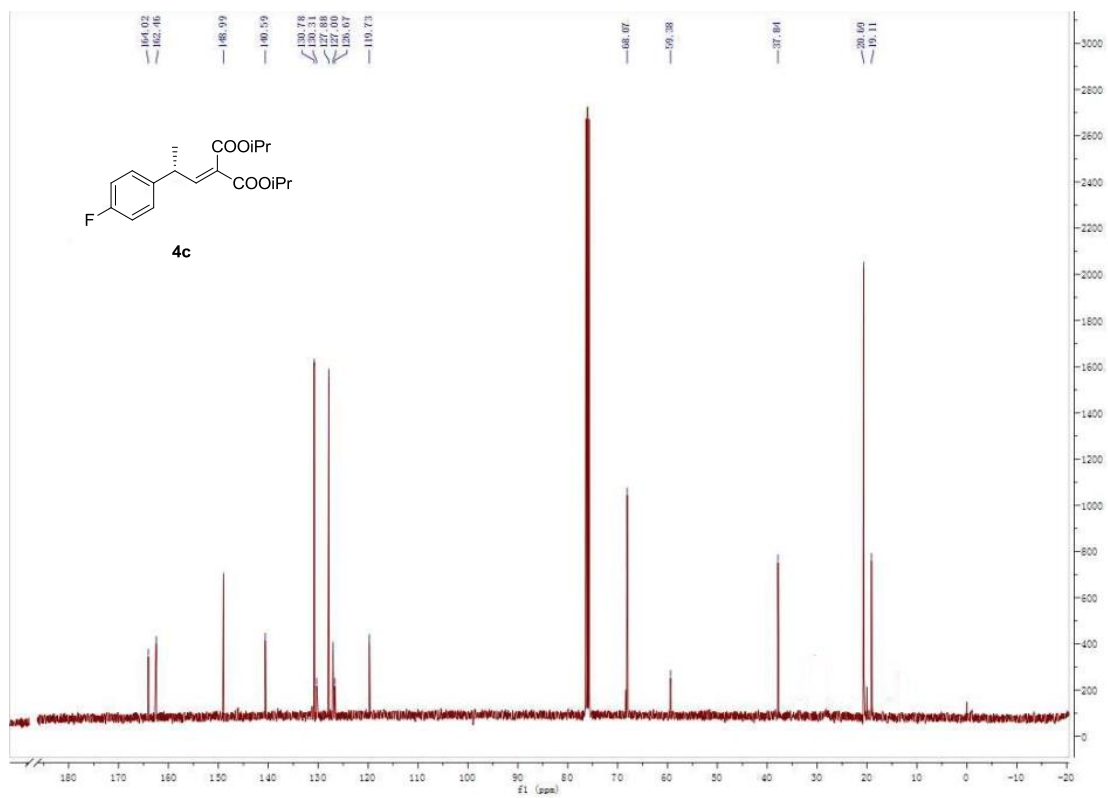

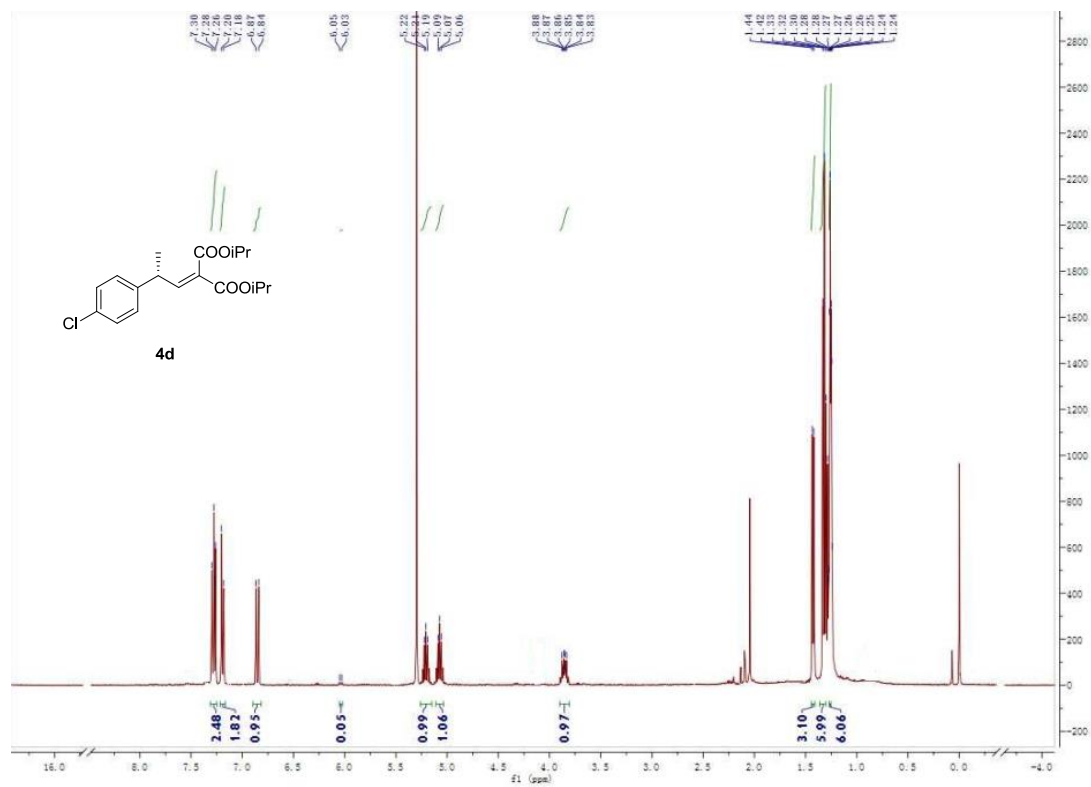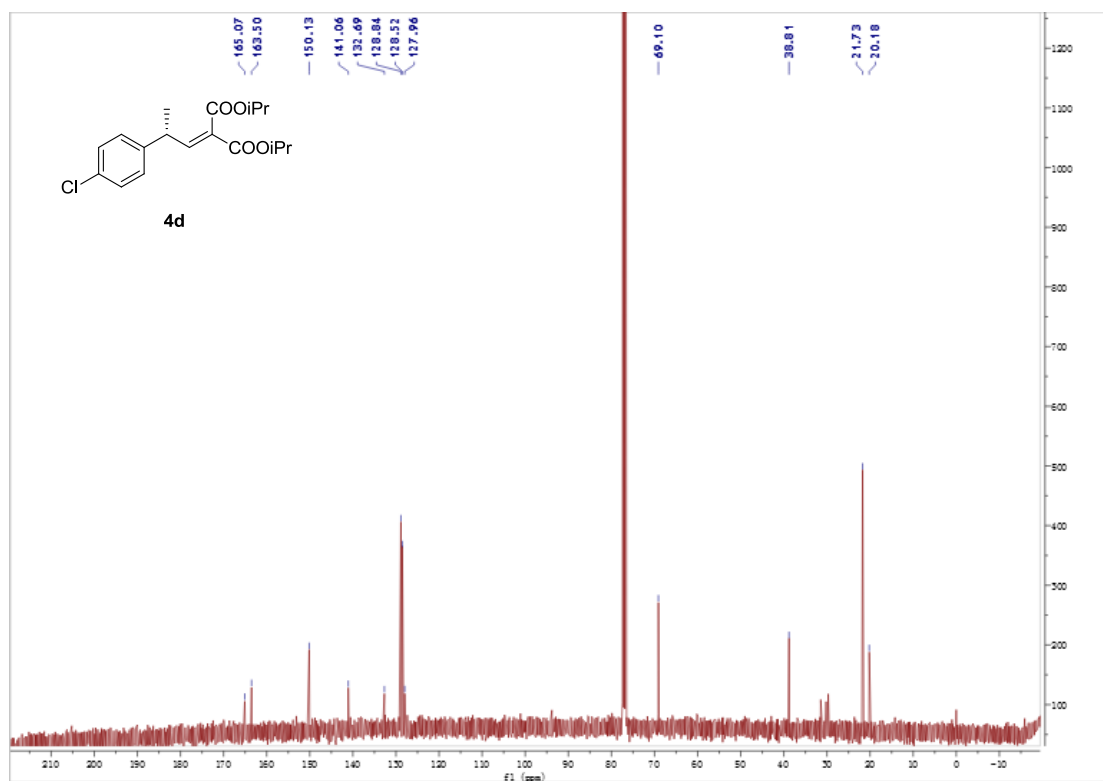

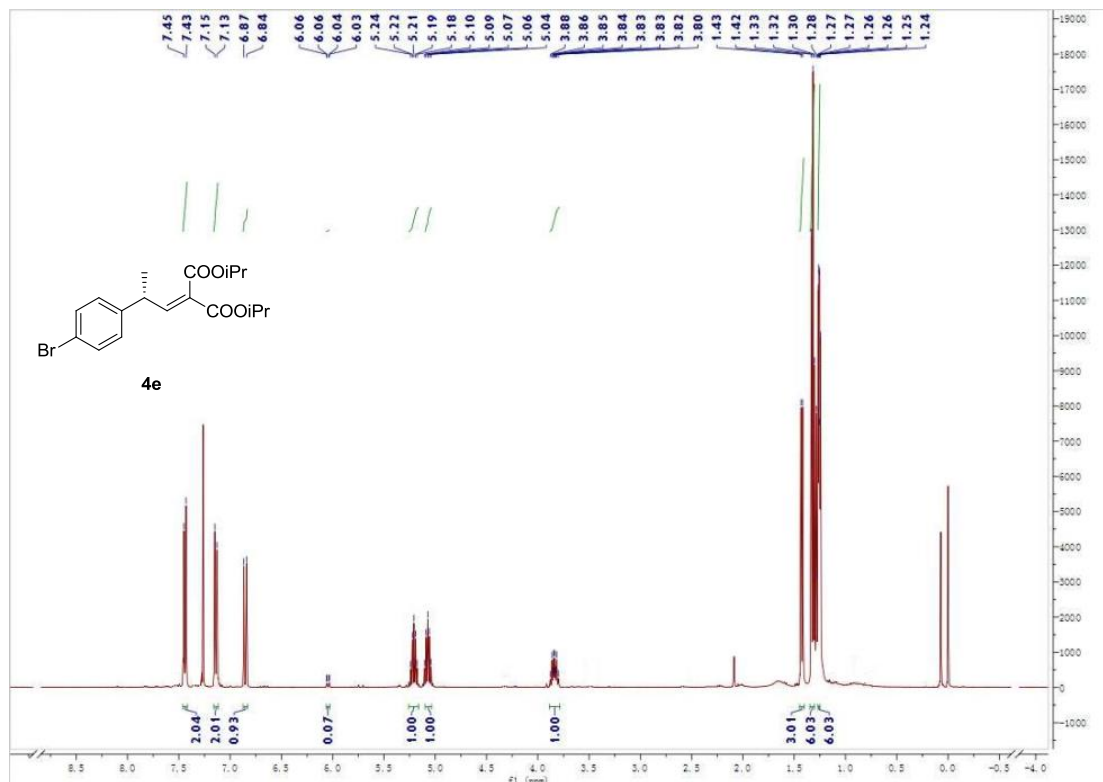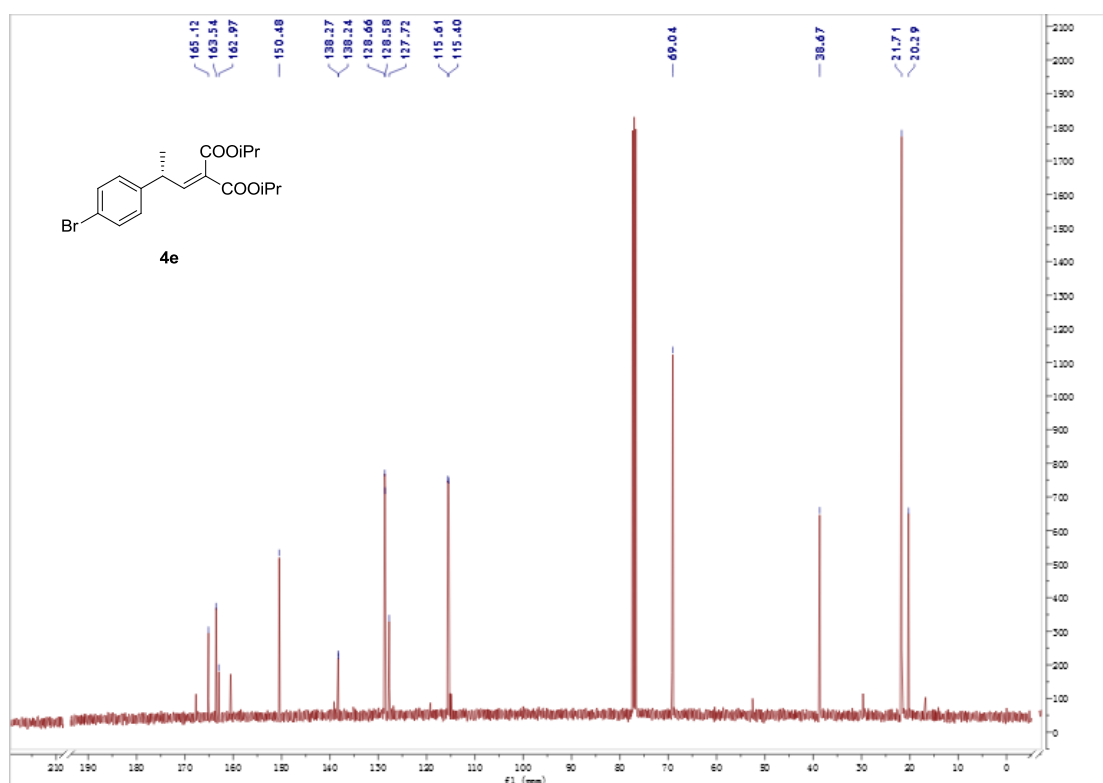

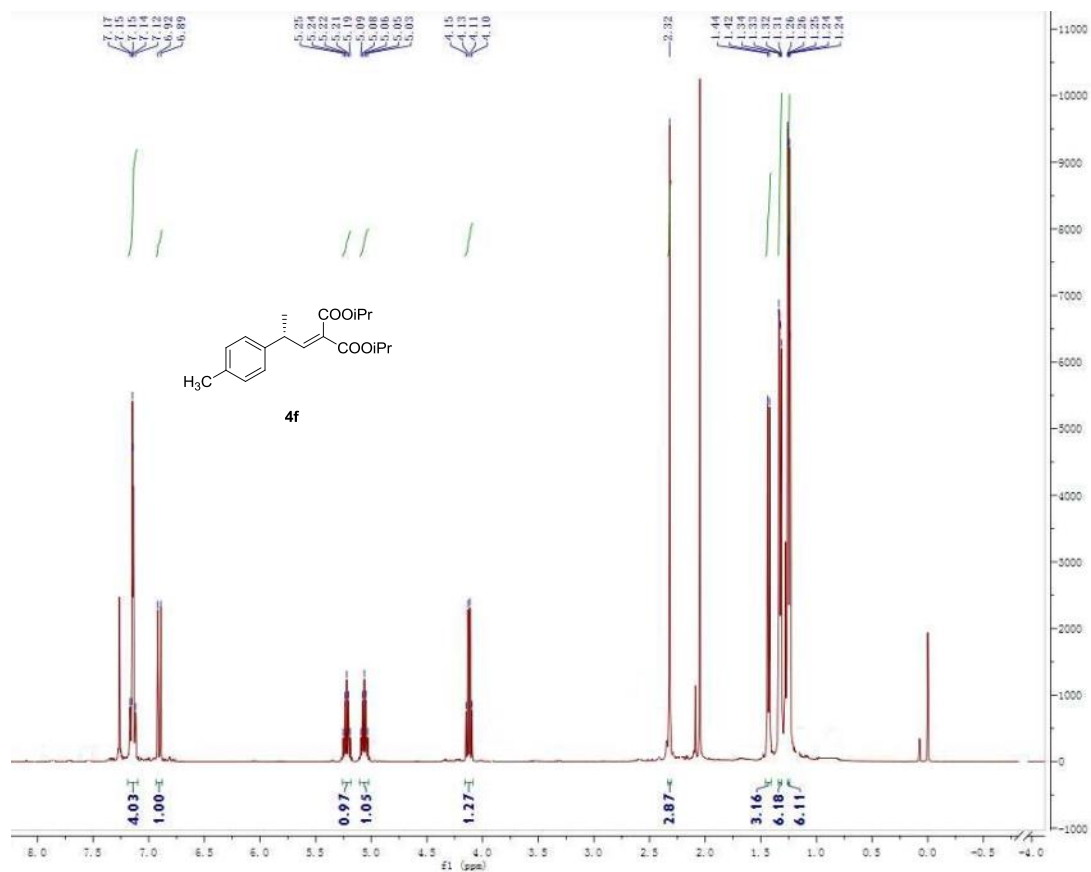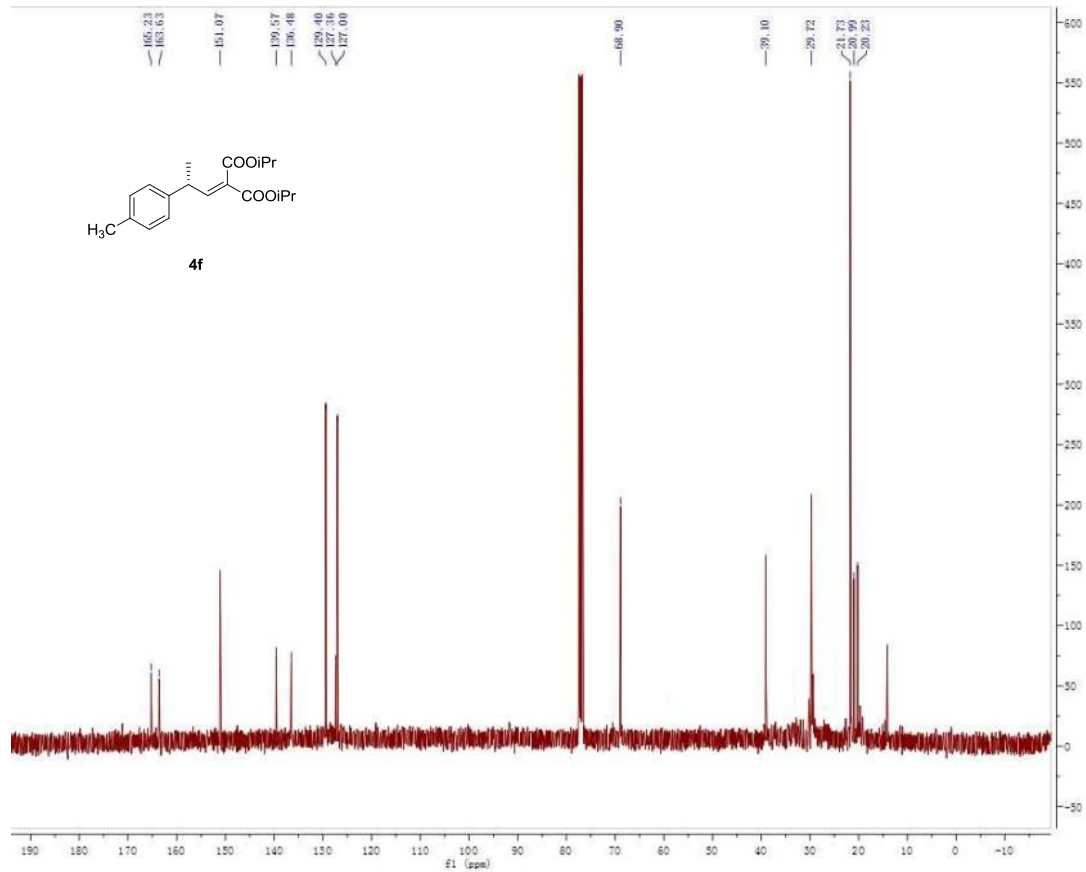

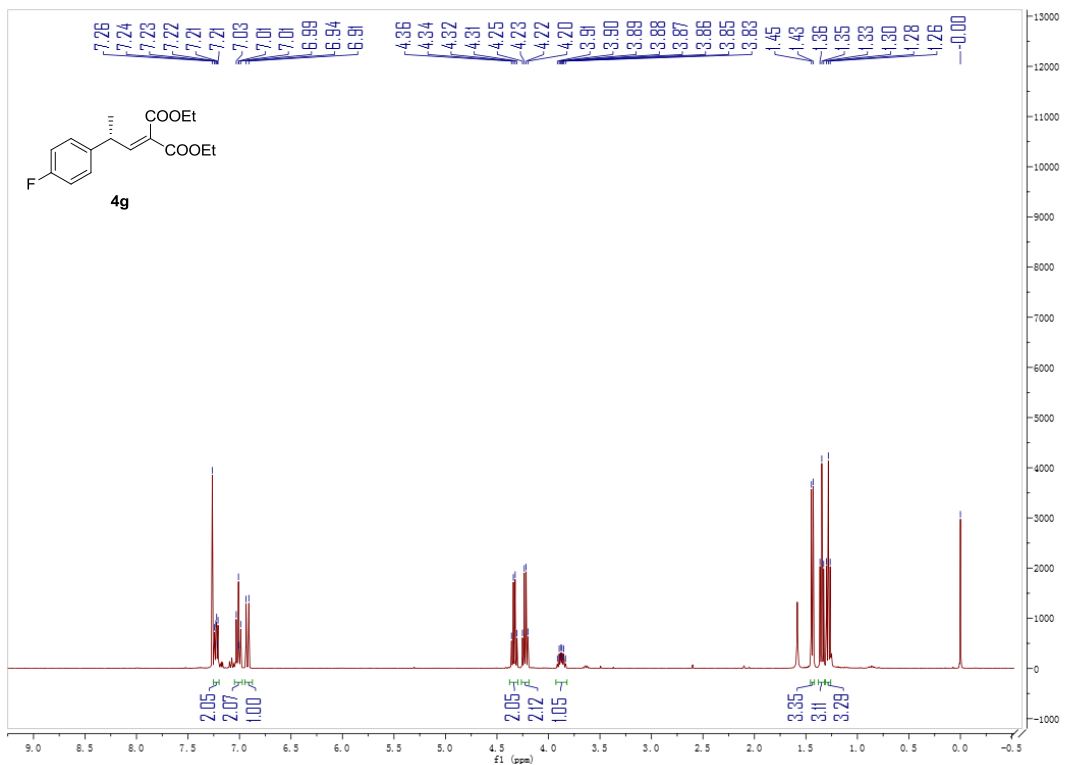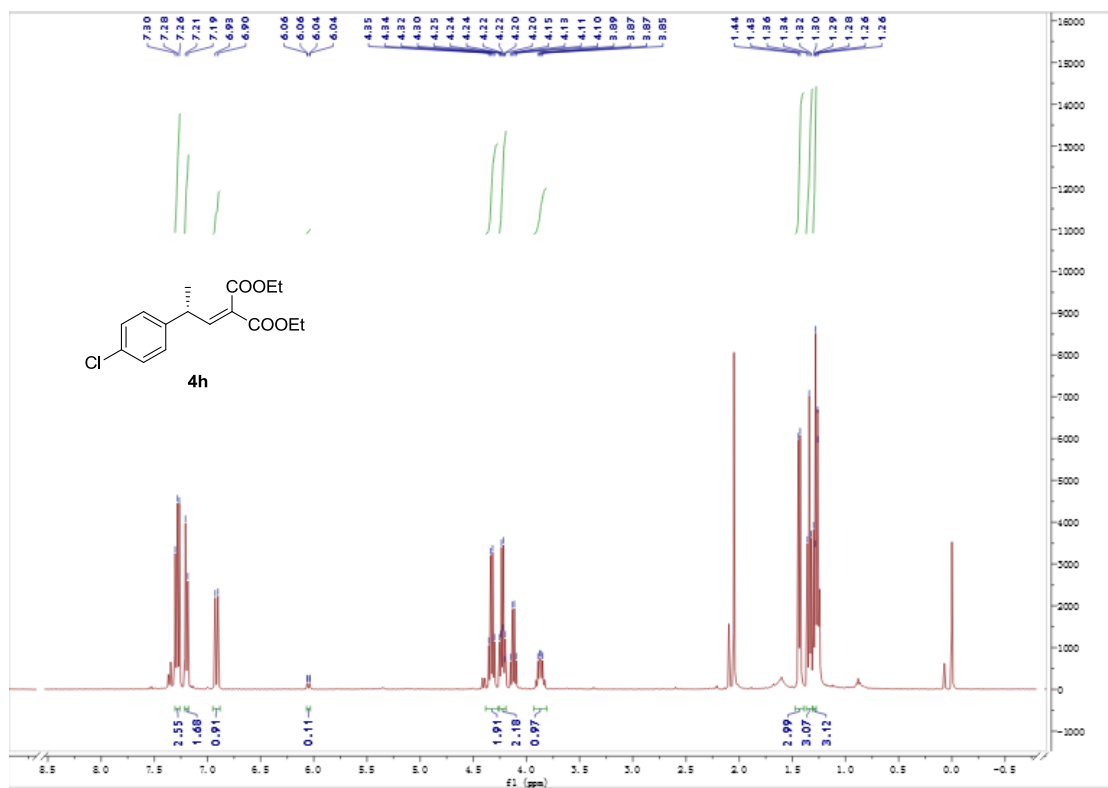

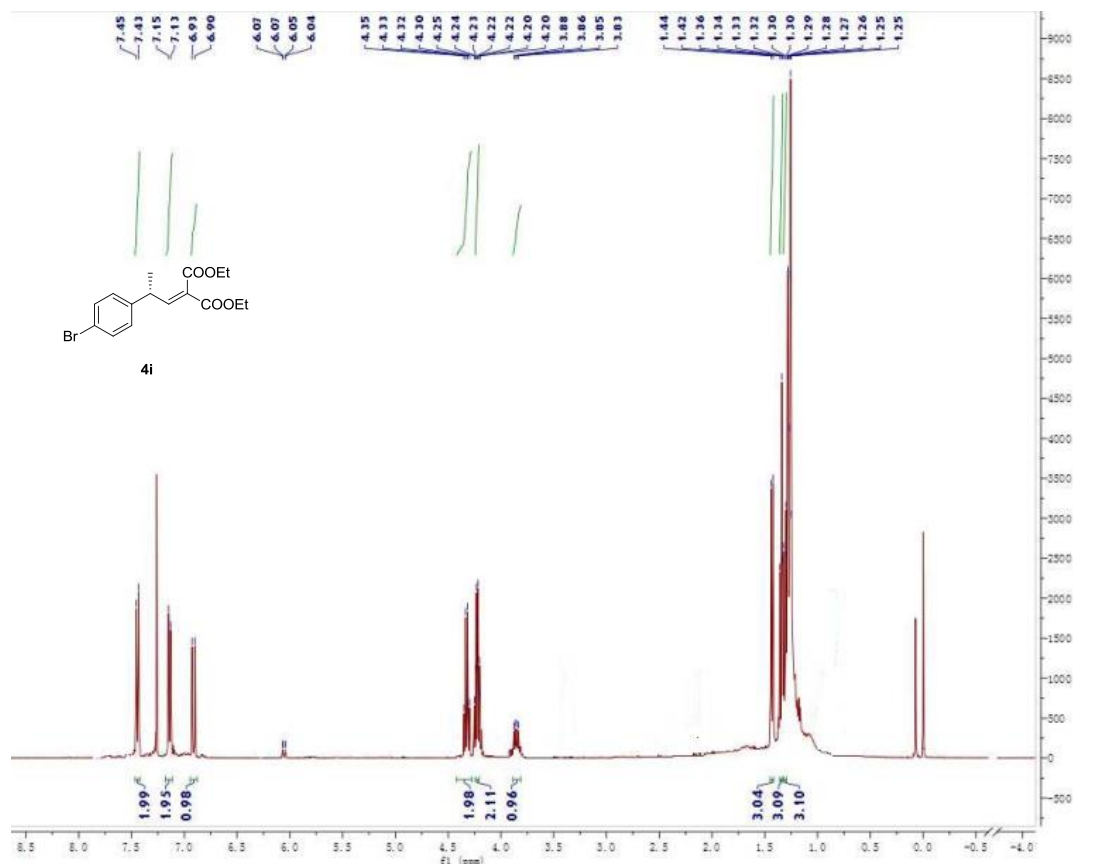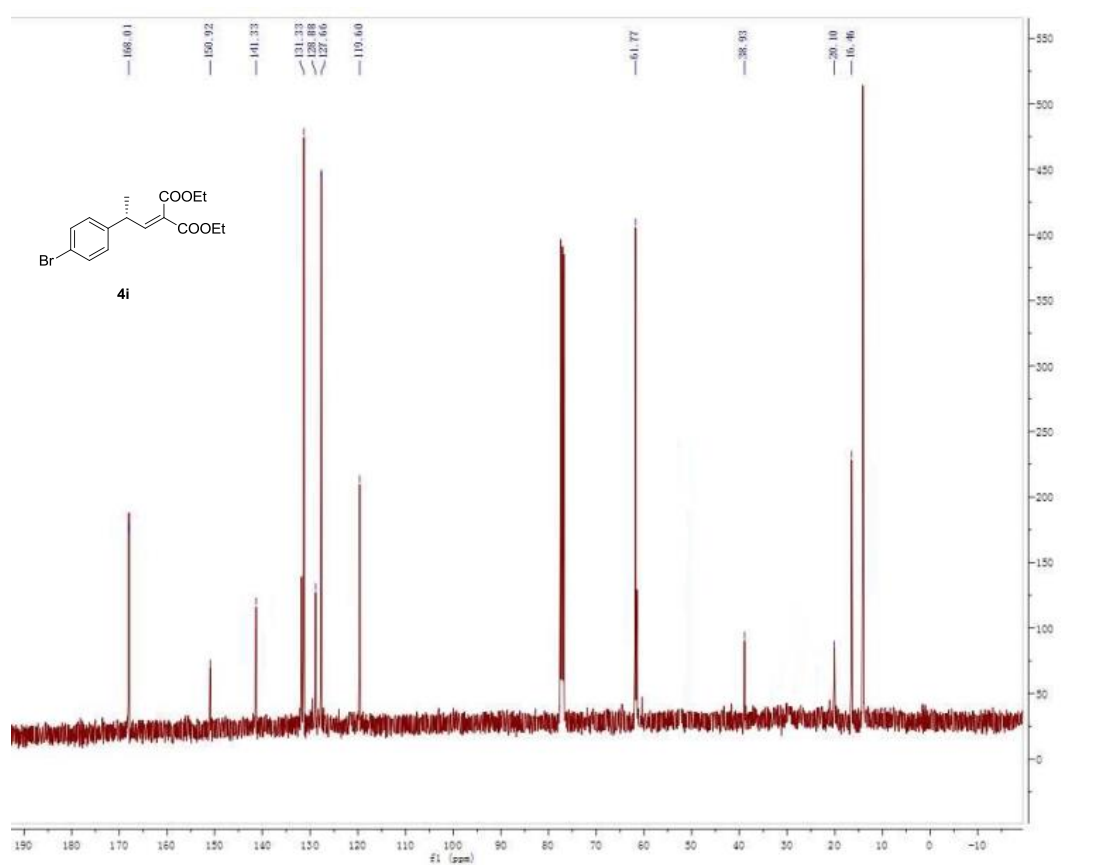

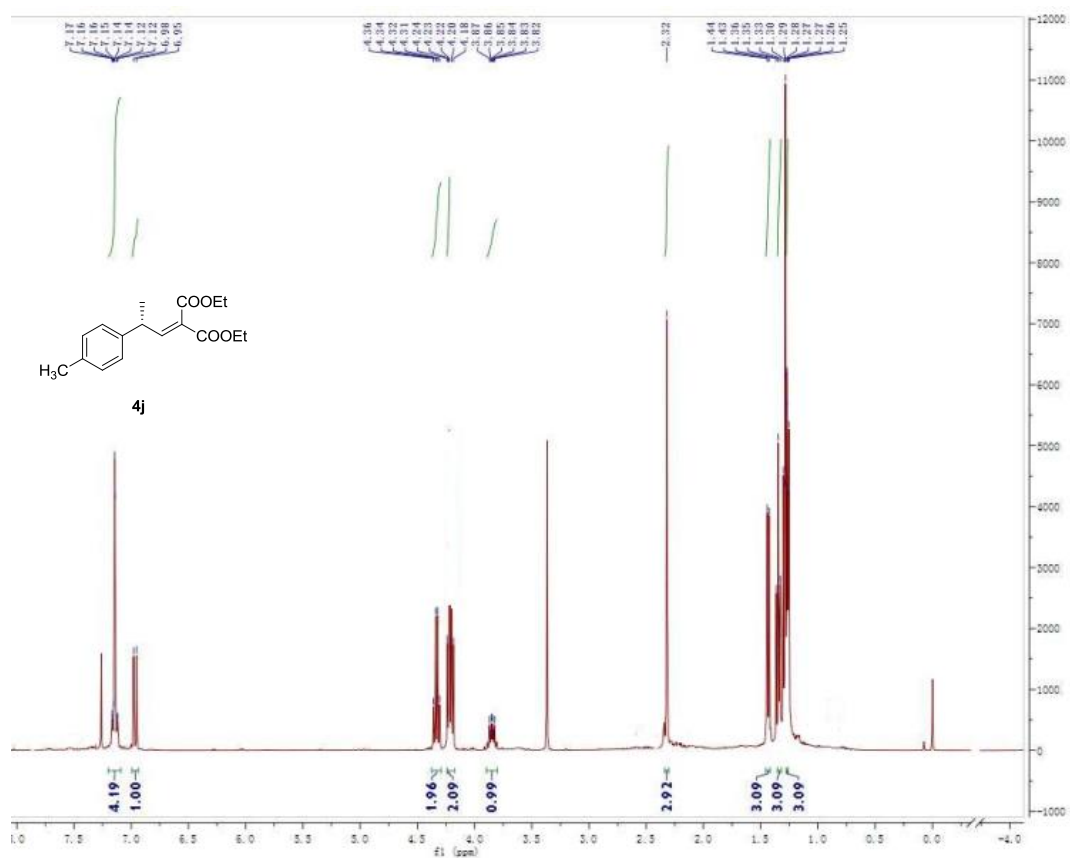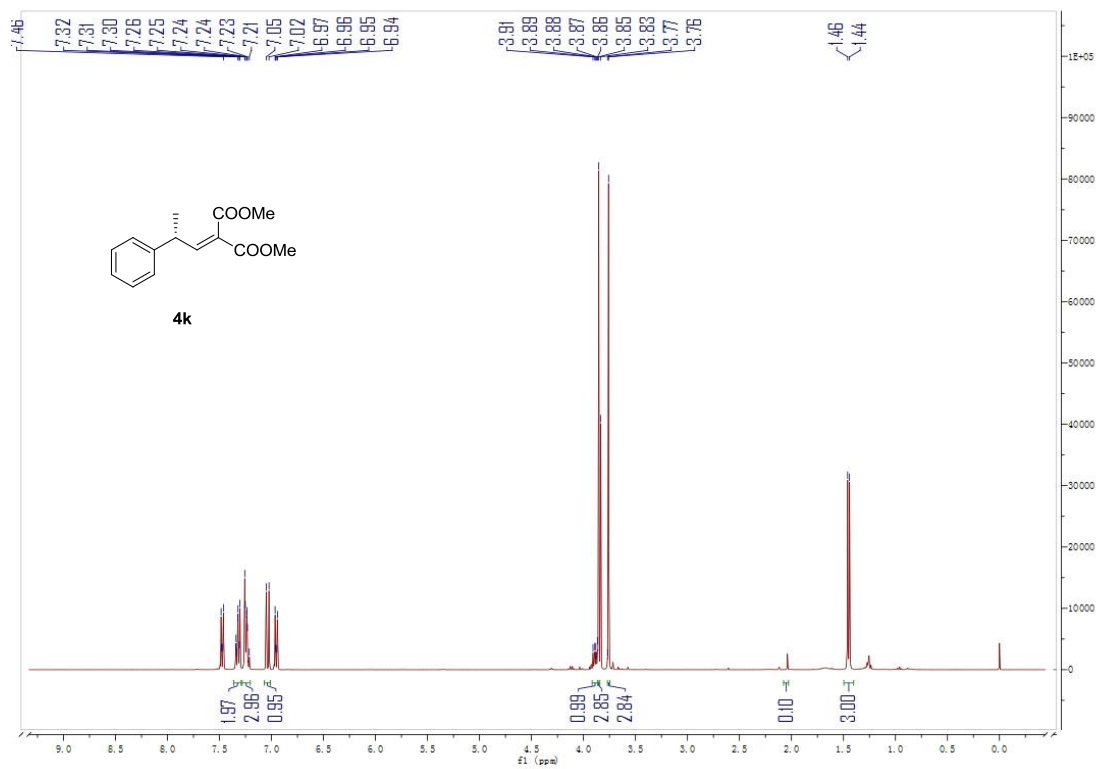

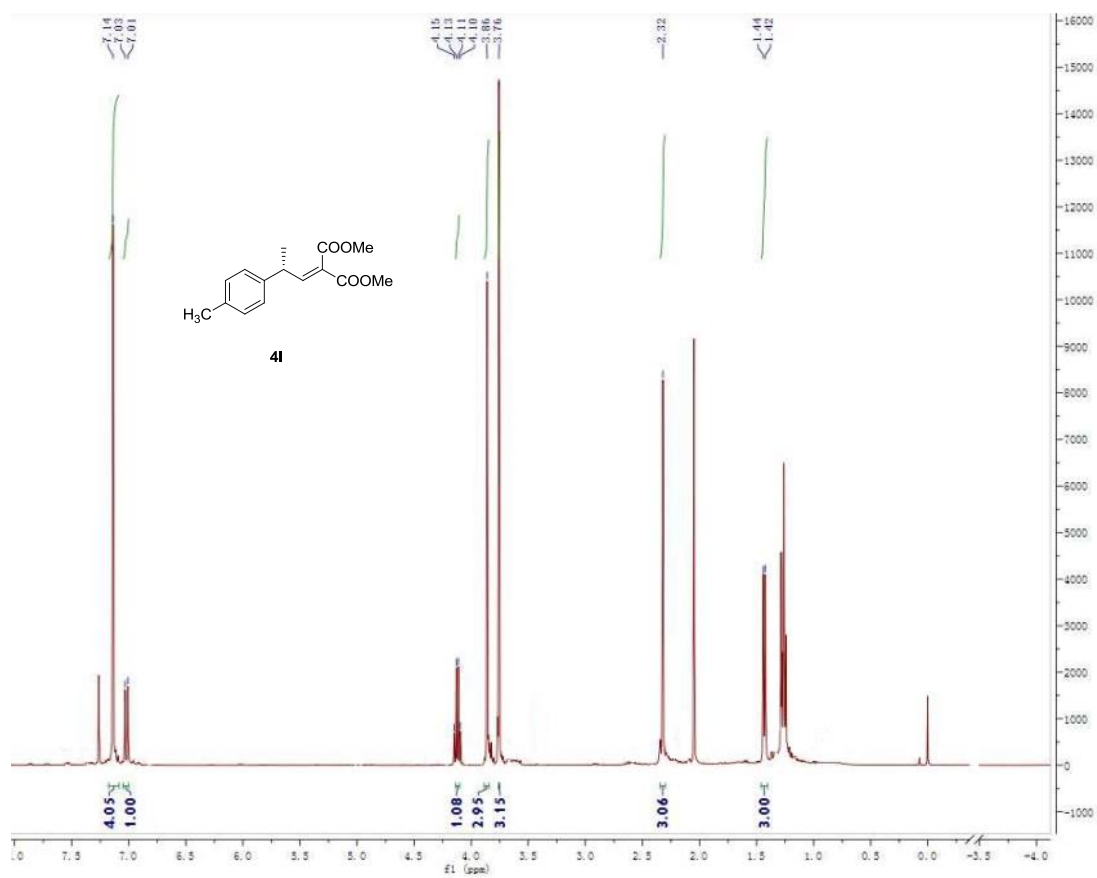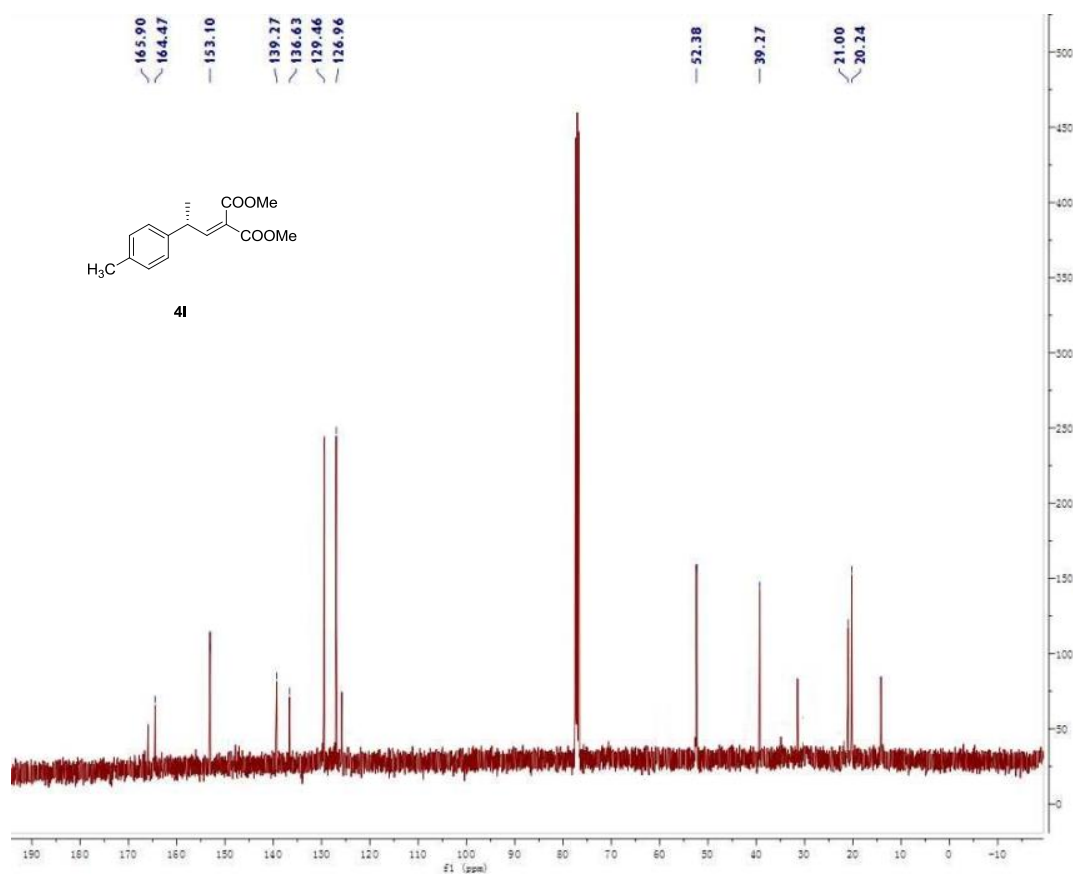

Supplement: c6nj00613b1.pdf [file c6nj00613b1.pdf]
